# Supplementary material
Source: PubMed Central journal article supplement (PMC3992975)
Supplement: NIHMS555958-supplement-1.pdf [file NIHMS555958-supplement-1.pdf]

Supplementary Information for  
**A general framework for estimating the relative pathogenicity of human  
genetic variants**

Martin Kircher<sup>1,\*</sup>, Daniela M. Witten<sup>2,\*</sup>, Preti Jain<sup>3</sup>, Brian J. O'Roak<sup>1</sup>, Gregory M. Cooper<sup>3,#</sup>, Jay Shendure<sup>1,#</sup>

<sup>1</sup> Department of Genome Sciences, University of Washington, Seattle, WA, USA

<sup>2</sup> Department of Biostatistics, University of Washington, Seattle, WA, USA

<sup>3</sup> HudsonAlpha Institute for Biotechnology, Huntsville, AL, USA

\* These authors contributed equally to this work

# To whom correspondence should be addressed (shendure@uw.edu, gcooper@hudsonalpha.org)

## **Table of Contents**

### **Figures:**

- Supplementary Figure 1 – Univariate models of distance to splice junction
- Supplementary Figure 2 – Heatmap of feature correlations among observed and simulated SNVs
- Supplementary Figure 3 – Interaction terms only improve a small subset of two feature models
- Supplementary Figure 4 – Convergence of SVM training as a function of generalization parameter C
- Supplementary Figure 5 – Correlation of predicted values from ten models obtained from different training data samples
- Supplementary Figure 6 – Median C-score ranges vary between functional gene classes
- Supplementary Figure 7 – Relationship of derived allele frequency of 1000 Genome SNVs and C-scores
- Supplementary Figure 8 – C-score percentiles and 1000 Genome DAF of SNVs and indels
- Supplementary Figure 9 – Average 1000 Genomes derived allele frequencies per C-score bin stratified by GC content, CpG density, B-scores and GerpS
- Supplementary Figure 10 – Discrimination of pathogenic versus benign alleles in MLL2
- Supplementary Figure 11 – Discrimination of HBB variants associated with varying degrees of severity for beta-thalassemia
- Supplementary Figure 12 – Receiver operating characteristics (ROC) for discriminating curated pathogenic (ClinVar) and matched apparently benign (ESP) variants
- Supplementary Figure 13 – Visual representation of the separation of curated pathogenic (ClinVar) and matched apparently benign (ESP) variants with different metrics
- Supplementary Figure 14 – Receiver operating characteristics (ROC) for discriminating curated pathogenic (ClinVar) and frequency matched ESP variants
- Supplementary Figure 15 – Receiver operating characteristics (ROC) for discriminating curated pathogenic (ClinVar) and  $\geq 5\%$  allele frequency ESP variants using annotation scores available from dbNSFP
- Supplementary Figure 16 – Ranking of ClinVar missense variants among variants identified in the genomes of eleven men from diverse populations
- Supplementary Figure 17 – Correlation between experimentally measured absolute expression fold change and annotation scores for all possible substitutions in two enhancers and one promoter.
- Supplementary Figure 18 – Correlation of C-scores with the statistical significance of genome wide association studies

### **Tables:**

- Supplementary Table 1 – Columns of the extended annotation tables
- Supplementary Table 2 – Imputation of missing values for model training and prediction
- Supplementary Table 3 – Univariate analyses for SNVs
- Supplementary Table 4 – Univariate analyses for deletions

Supplementary Table 5 – Univariate analyses for insertions

Supplementary Table 6 – Depletion of observed SNVs in each consequence bin

Supplementary Table 7 – Interaction of SNV consequence and cDNA position

Supplementary Table 8 – Distribution of scaled C-scores across categorical consequence bins

Supplementary Table 9 – Comparison of metrics for scoring *de novo* variants in ASD and ID

Supplementary Table 10 – Ranking of pathogenic variants compared to SNVs observed in whole genome sequencing of eleven human individuals from diverse human populations

Supplementary Table 11 – Number of SNVs observed per scaled C-score bin in NIH ClinVar pathogenic, the 1000 Genomes low coverage data, derived variants on the Chimpanzee lineage and eleven humans

Supplementary Table 12 – Comparison of CADD scores between GWAS SNPs and matched controls

**Supplementary Note:**

1 – Simulated and observed variants

2 – Variant annotation matrix

3 – Imputation

4 – Exploratory analysis of annotations

5 – Model training

6 – Model testing and validation

7 – Increased C-scores of GWAS lead SNPs

8 – Notes on using scaled and unscaled C-scores

## SUPPLEMENTARY FIGURES

**Supplementary Figure 1:** Univariate models of distance to splice junction. Logistic regression models were fit to the SNVs in order to predict whether a variant is observed or simulated, using the variant's distance from splice site (treated as a categorical variable) for sites in the exon donor, intron donor, intron acceptor, and exon acceptor regions. The red dots indicate the probability that a variant is observed (as opposed to simulated) given its splice position. The gray line indicates the overall fraction of variants in the exon donor, intron donor, intron acceptor, and exon acceptor region that are observed (as opposed to simulated). 95% confidence intervals are shown.

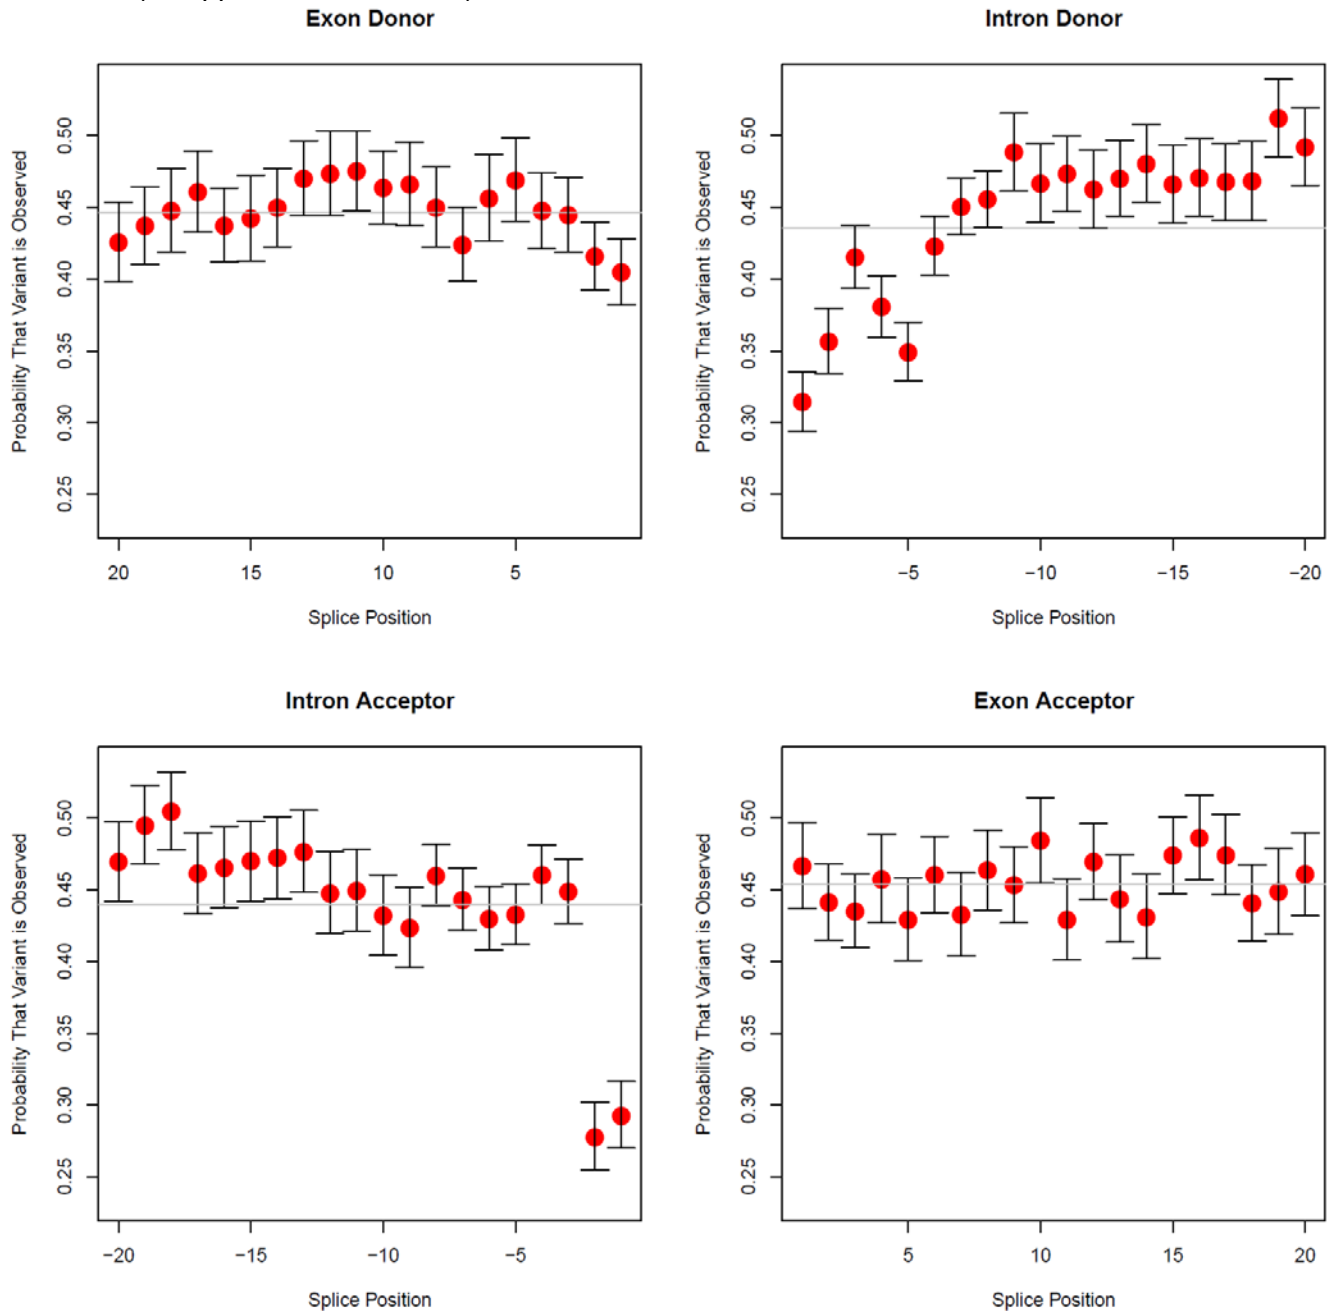



**Supplementary Figure 3:** Interaction terms only improve a small subset of two-feature linear regression models for predicting whether a variant is observed or simulated. For each pair of features, the ratio (AUC for a linear regression model with interaction)/(AUC for a linear regression model with only main effects) is shown. A large ratio indicates a pair of features for which including an interaction term leads to improvement in the model. For nearly all pairs of features, the inclusion of an interaction in the model leads to little improvement in AUC. Models were fit to SNVs only. White squares indicate pairs of features for which the ratio was not computed.

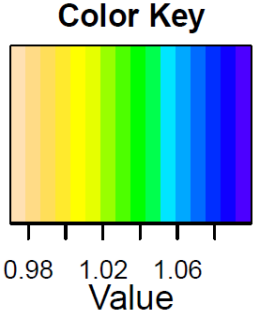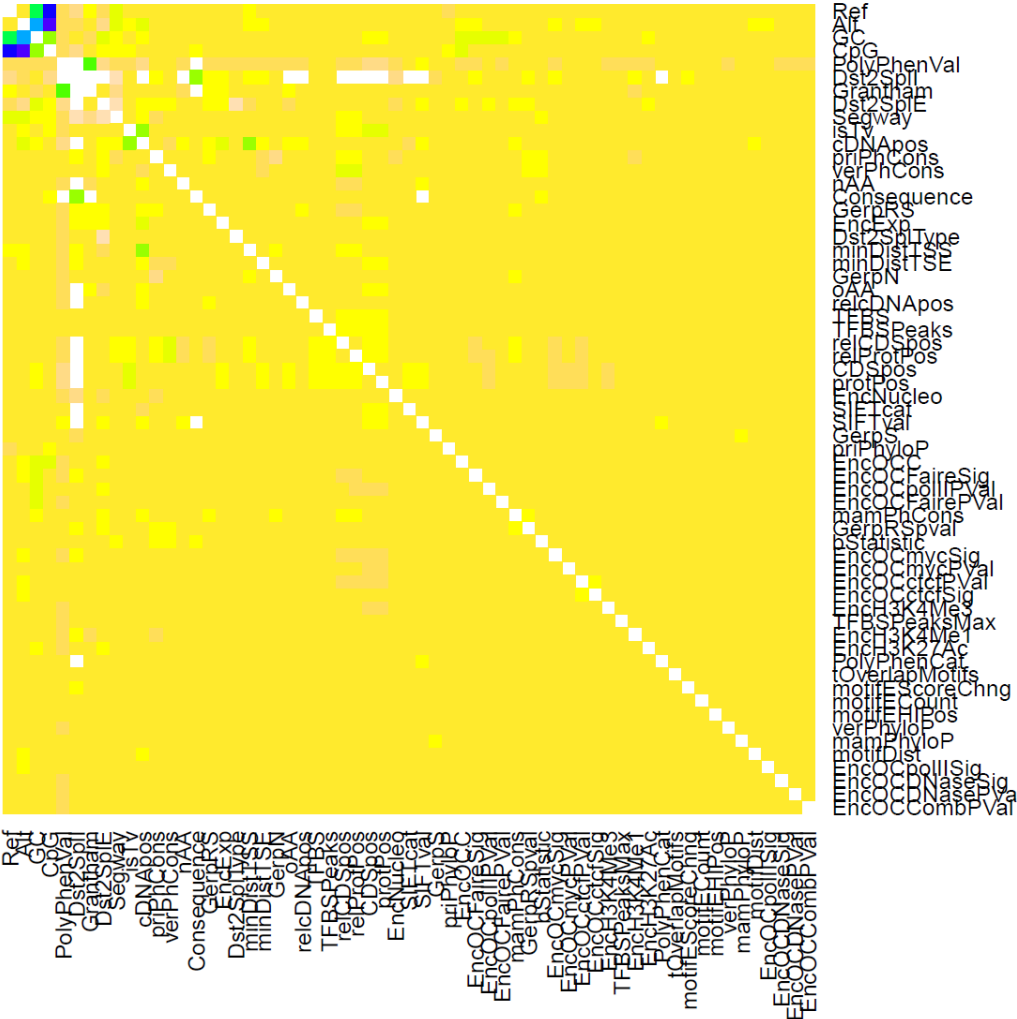

**Supplementary Figure 4:** SVM model training convergence in 2000 iterations (~70h) for different settings of the generalization parameter C. Training with C = 0.0025 or C = 0.001 successfully converged in this timeframe. On the y-axis, 1-QD/DP indicates the relative reduction in the objective value over subsequent iterations; a small value indicates convergence.

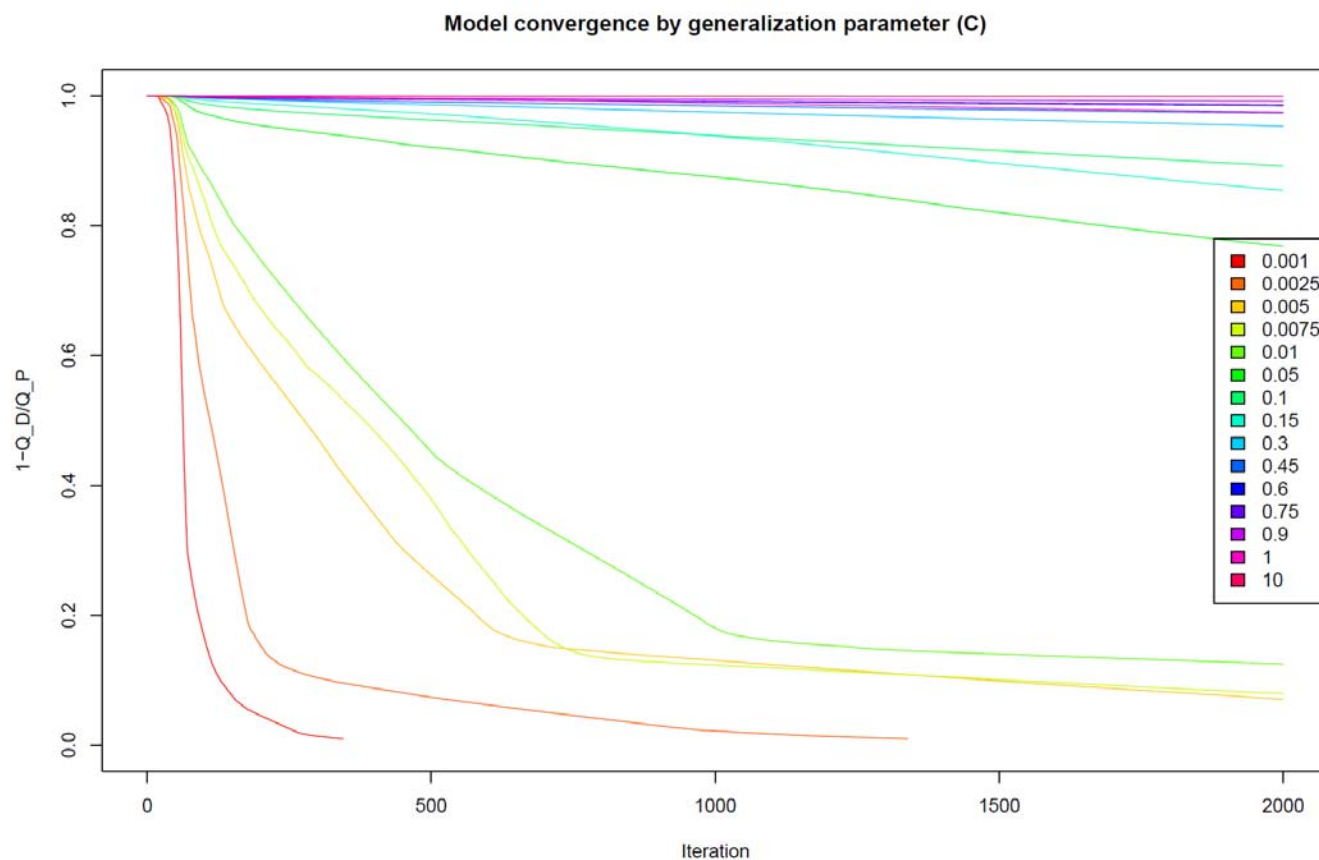

**Supplementary Figure 5:** Pearson and Spearman correlation between ten models obtained from different training data samples for predicted values of 100,000 random single nucleotide variants from the 1000 Genomes project as well as 100,000 random substitutions from GRCh37/hg19 chromosome 21.

**Pearson correlation: random sites from 1000 Genomes**

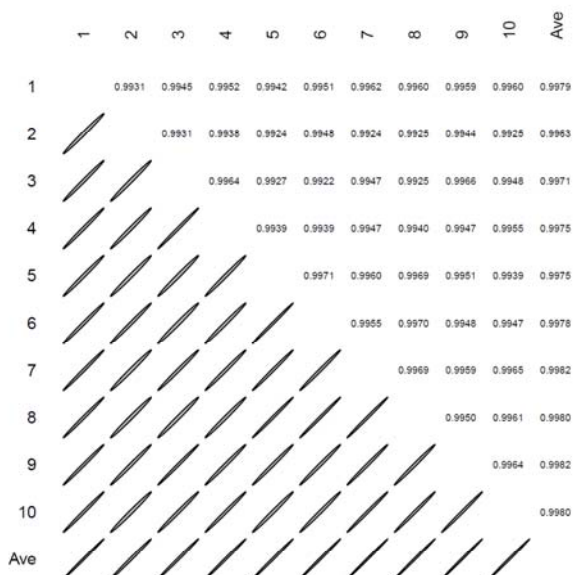

**Spearman correlation: random sites from 1000 Genomes**

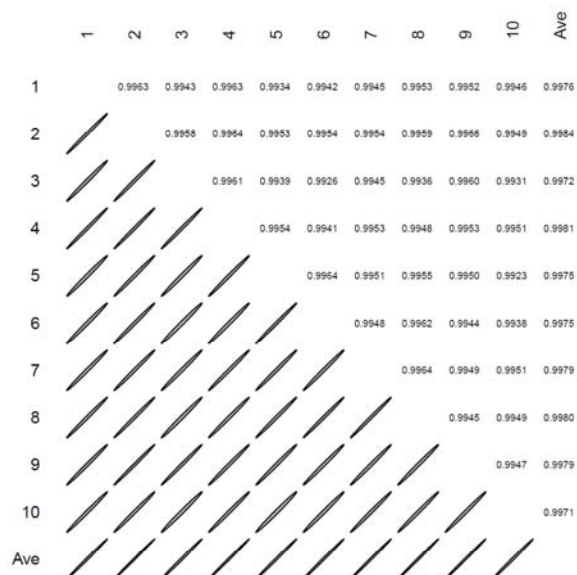

**Pearson correlation: random sites from chromosome 21**

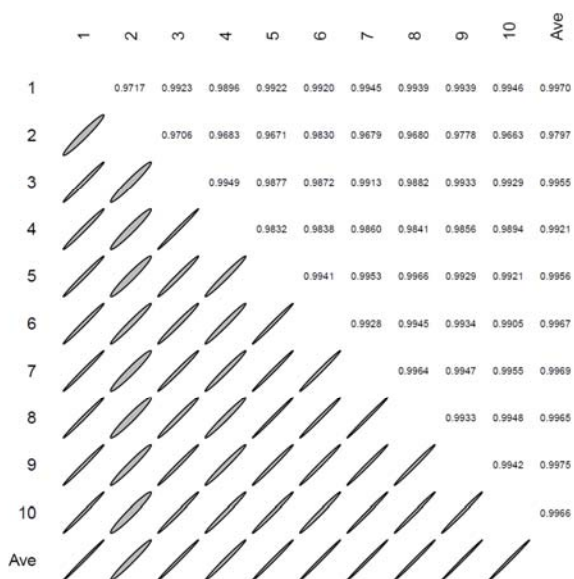

**Spearman correlation: random sites from chromosome 21**

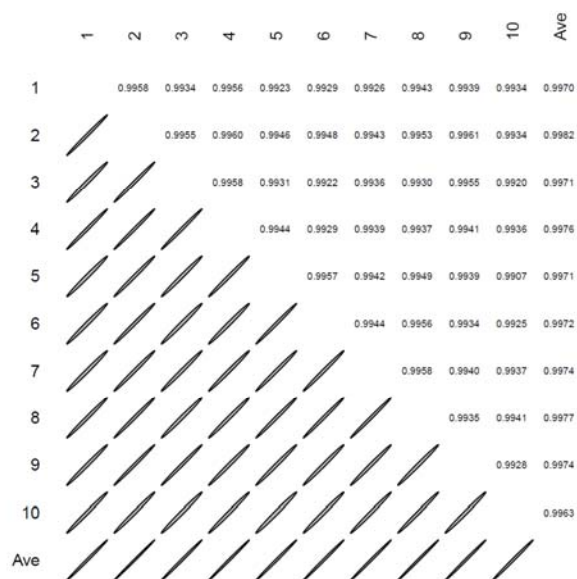



**Supplementary Figure 6:** Violin plots of the median SNV C-score across the genes coding sequence (padded by 10bp non-coding sequence around each exon), putative missense (non-synonymous) variants and putative non-sense (stop-gained) variants for different functional gene categories. The source for genes comprising each category are described in Supplementary Methods.

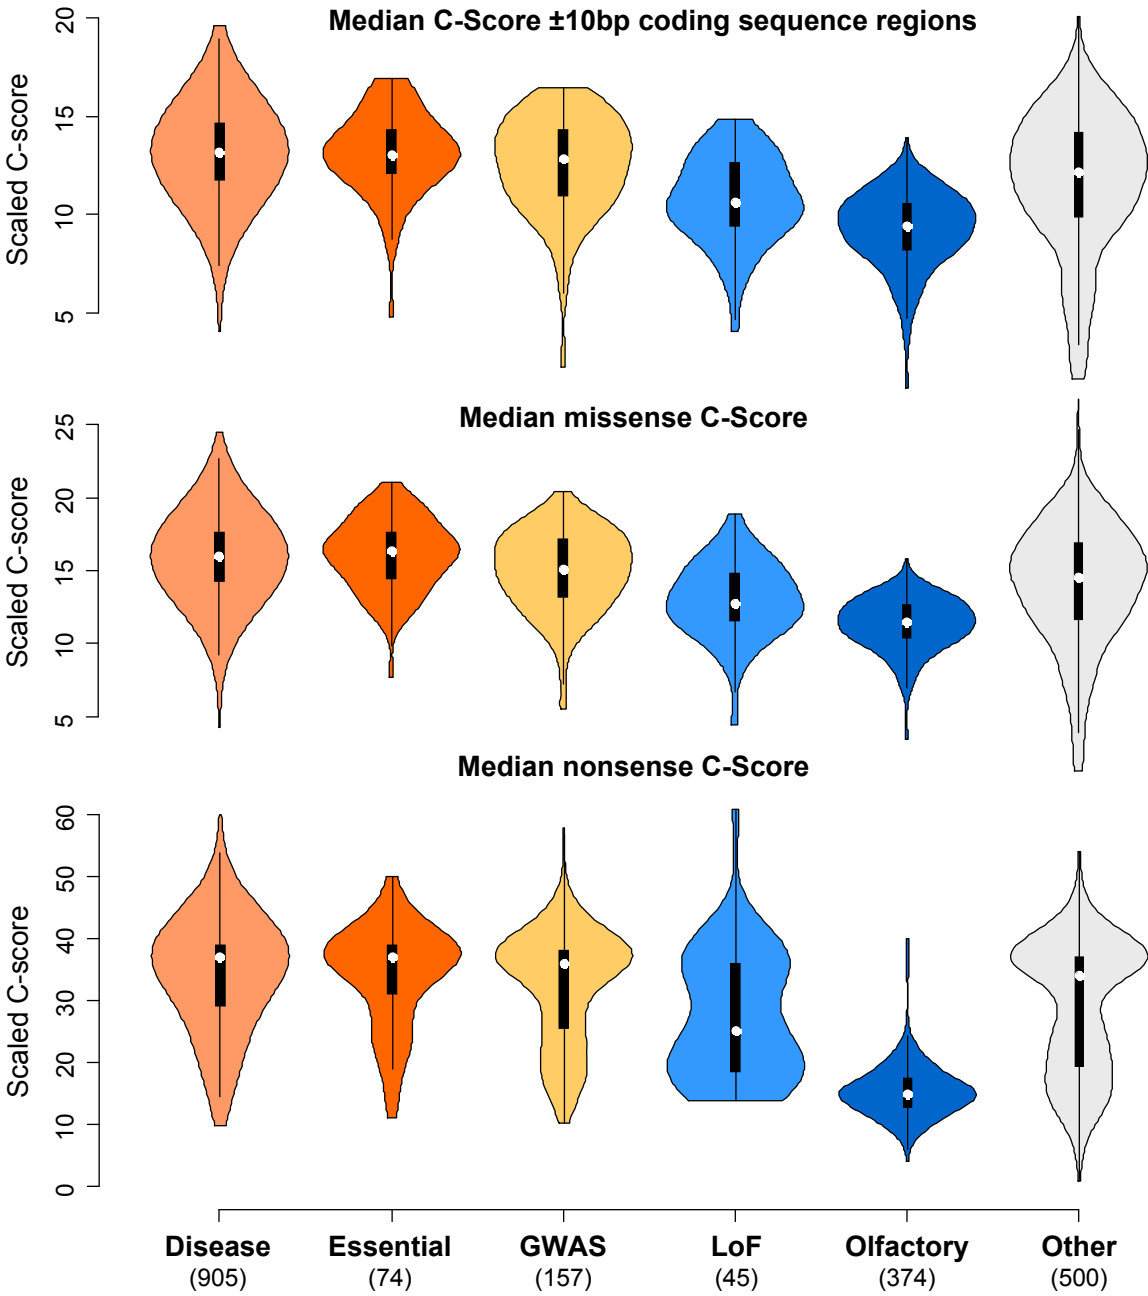

**Supplementary Figure 7:** Relationship of derived allele frequency of 1000 Genome SNVs with C-scores. Although no information pertaining to DAF was used to calculate C-scores, a significant negative correlation is observed (Spearman rank correlation  $-0.0825$ ,  $n = 36,853,235$ ,  $p\text{-value} < 10^{-300}$ ). The over-representation of low C-scores (green to yellow colors) for high frequency derived alleles as well as the over-representation of high C-scores (red to white color range) for low frequency derived alleles is driving this correlation.

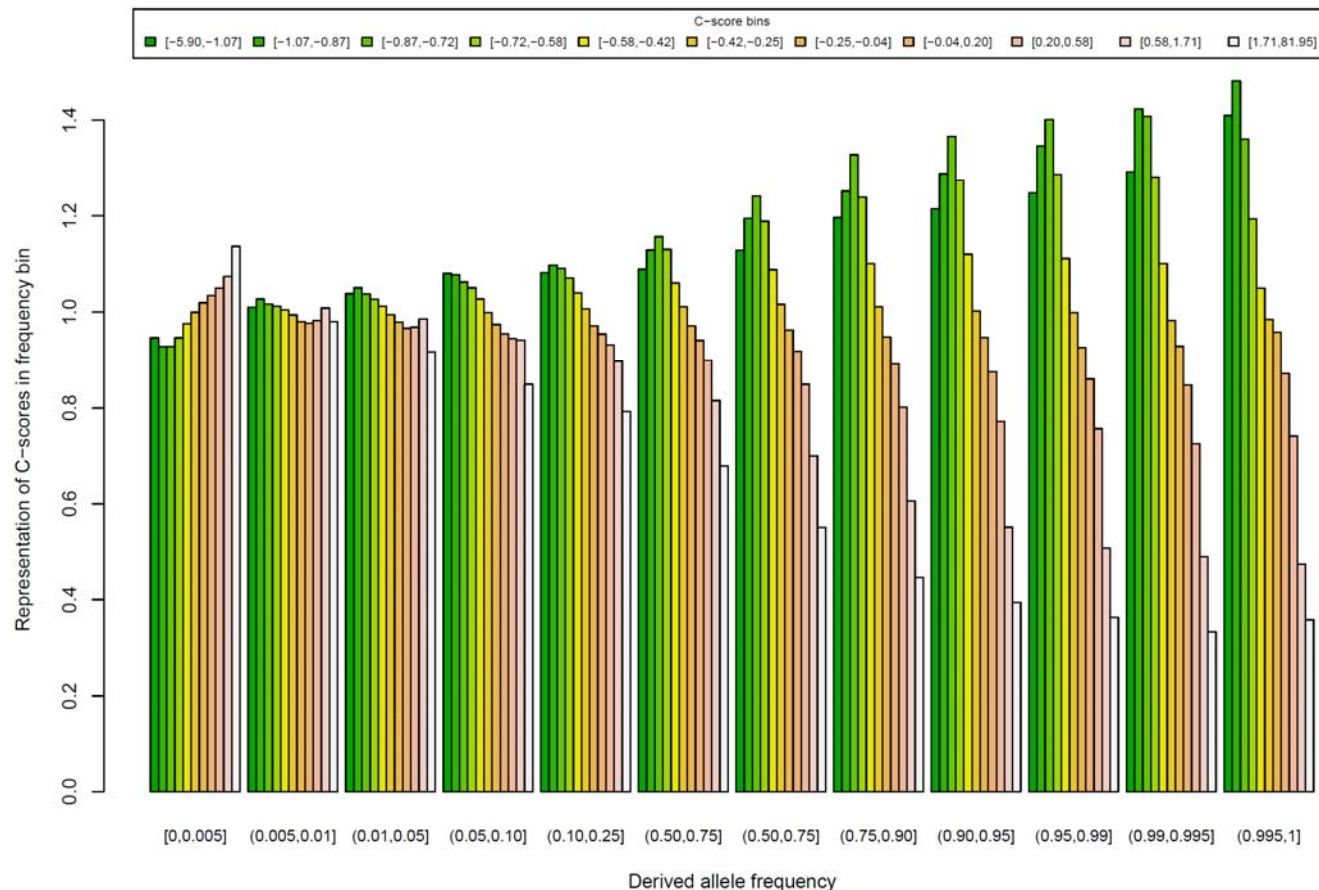

**Supplementary Figure 8:** A smoothed scatterplot representation of derived allele frequency and unscaled C-scores. A significant negative correlation is observed for SNVs (Spearman rank correlation  $-0.0825$ ,  $n = 36,853,235$ ,  $p\text{-value} < 10^{-300}$ ) and InDels (Spearman rank correlation  $-0.0688$ ,  $n = 1,388,296$ ,  $p\text{-value} < 10^{-300}$ ).

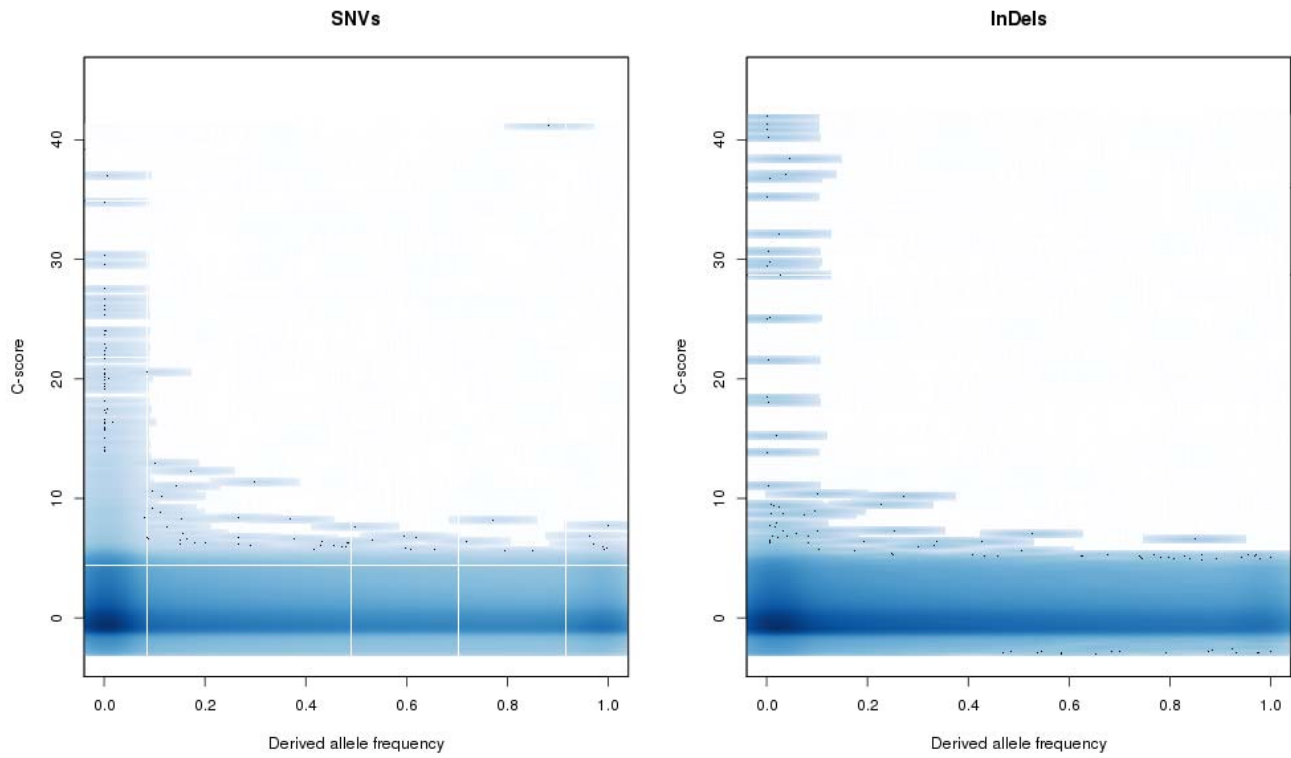

**Supplementary Figure 9:** Relationship between scaled C-scores and standing variation in the human population based on the average derived allele frequency (DAF) per C-score bin for variants identified in the 1000 Genomes Project<sup>1</sup>. The black line in this figure is identical to the black line in the upper panel of Fig. 2, while colored lines show the stratification for different values of the model's input features GC content, CpG content, B-score (bStatistic) and GerpS. The % of total sites associated with each stratification bin is provided in parentheses in the legend.

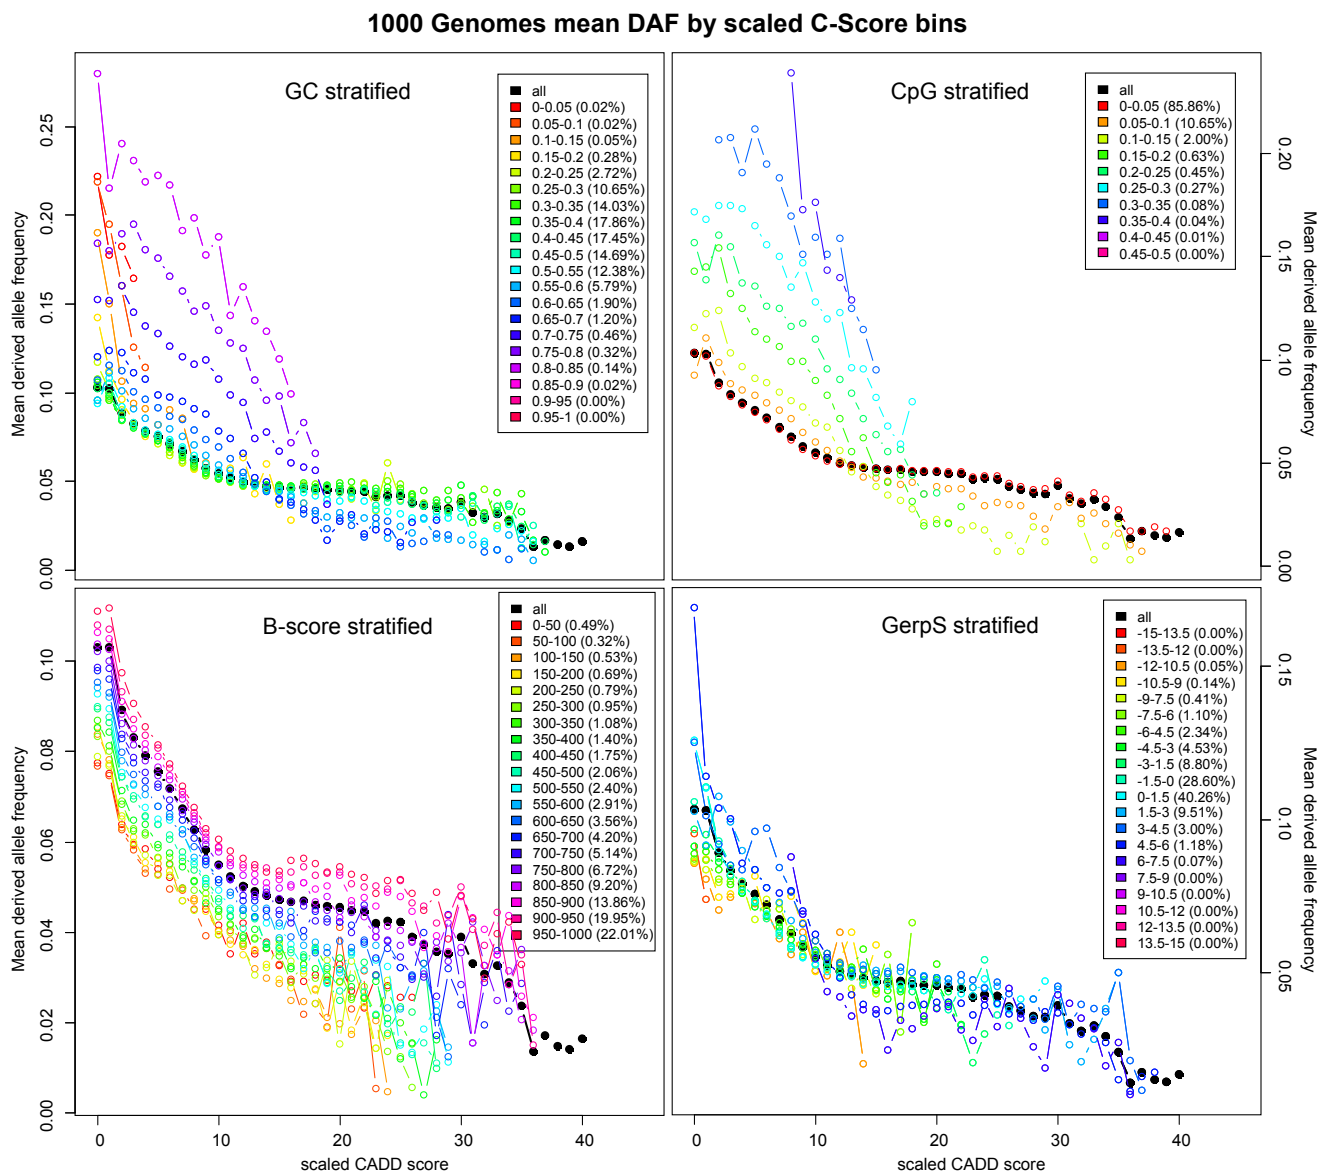

**Supplementary Figure 10:** Discrimination of disease-associated *MLL2* alleles versus rare, apparently benign alleles in *MLL2* obtained from ESP. Shown are boxplots for all observed variants (upper panel) as well as restricted to non-synonymous variants (lower panel). P-values for the Wilcoxon rank sum test with continuity correction testing a difference between the sets of pathogenic (n=210) and benign (n=679) variants (upper panel) are C-scores:  $9.87 \times 10^{-94}$ , GerpS:  $1.94 \times 10^{-41}$ , mammalian PhastCons:  $1.78 \times 10^{-26}$ , and mammalian PhyloP:  $1.28 \times 10^{-41}$ . The respective p-values of the lower panel are C-score:  $1.09 \times 10^{-7}$  (n=33/273), PolyPhen  $5.39 \times 10^{-2}$  (n=2/12), SIFT  $1.38 \times 10^{-1}$  (n=2/8), Grantham  $4.20 \times 10^{-2}$  (n=33/273). Note that PolyPhen and SIFT scores are not available from VEP for the overwhelming majority of missense variants in *MLL2*, limiting those comparisons.

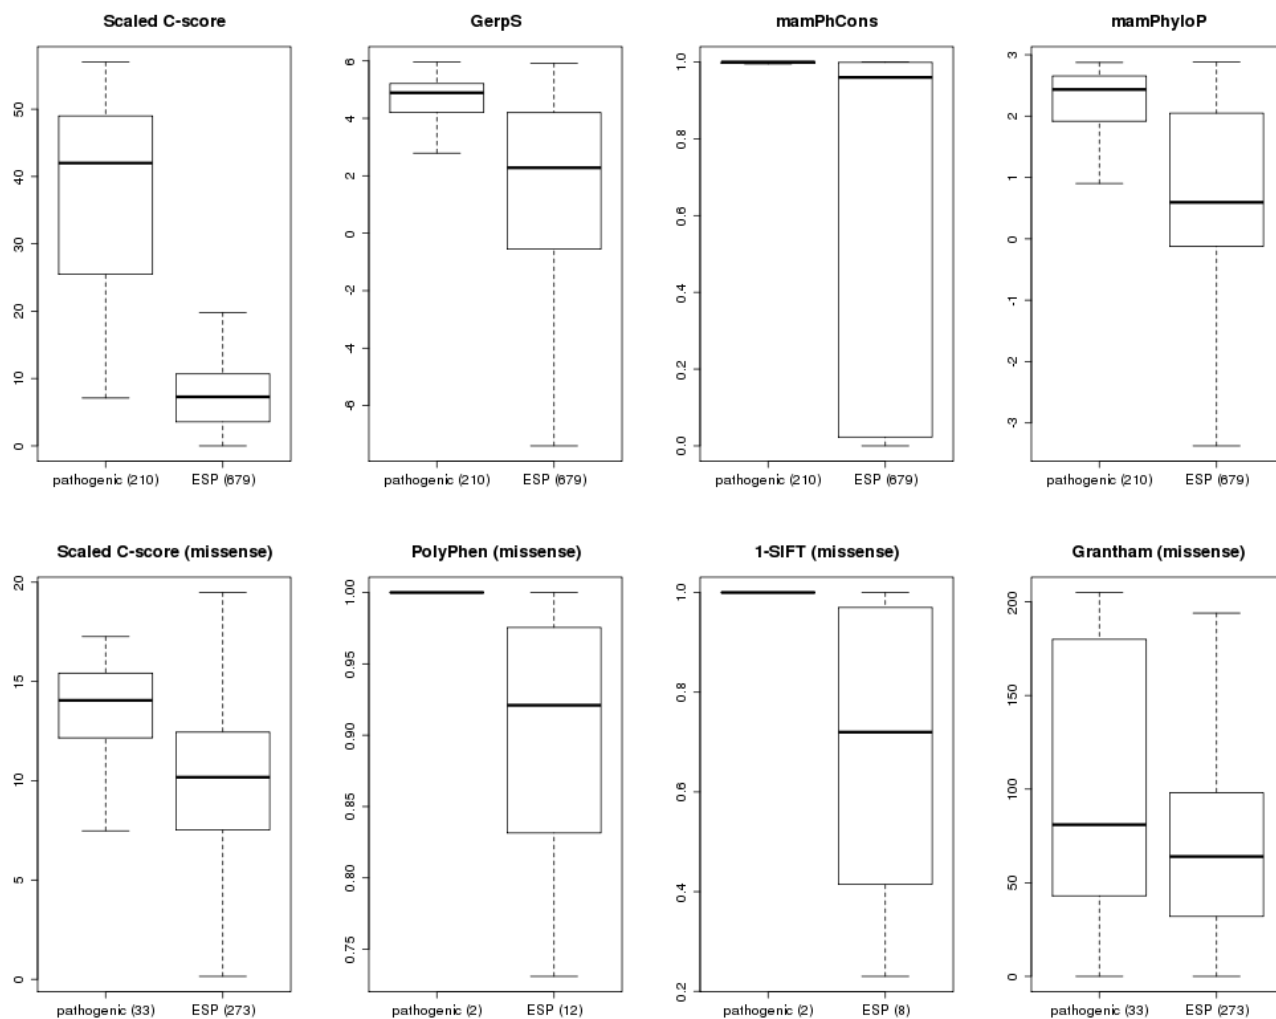

**Supplementary Figure 11:** Boxplot with notches<sup>2</sup> and without outliers for C-scores, GerpS, mammalian PhastCons (mamPhCons) and mammalian PhyloP (mamPhyloP) scores for HBB disease variants grouped by severity [mild: beta+ (n=48), intermediate: other (n=65), and severe: beta0 (n=99)]. Only 22 out of 212 reported variants result in a missense event; therefore scoring of these variants is largely limited to conservation-based measures. A Kruskal-Wallis rank sum test for the separation of the three disease types using C-ccores yields a chi-squared of 30.4665 (df = 2, p-value =  $2.42 \times 10^{-7}$ ). It clearly outperforms the three conservation-based measures: GerpS chi-squared = 17.2366 (p-value =  $1.81 \times 10^{-4}$ ), mamPhCons chi-squared = 19.917 (p-value =  $4.73 \times 10^{-5}$ ), and mamPhyloP chi-squared = 21.3717 (p-value =  $2.29 \times 10^{-5}$ ).

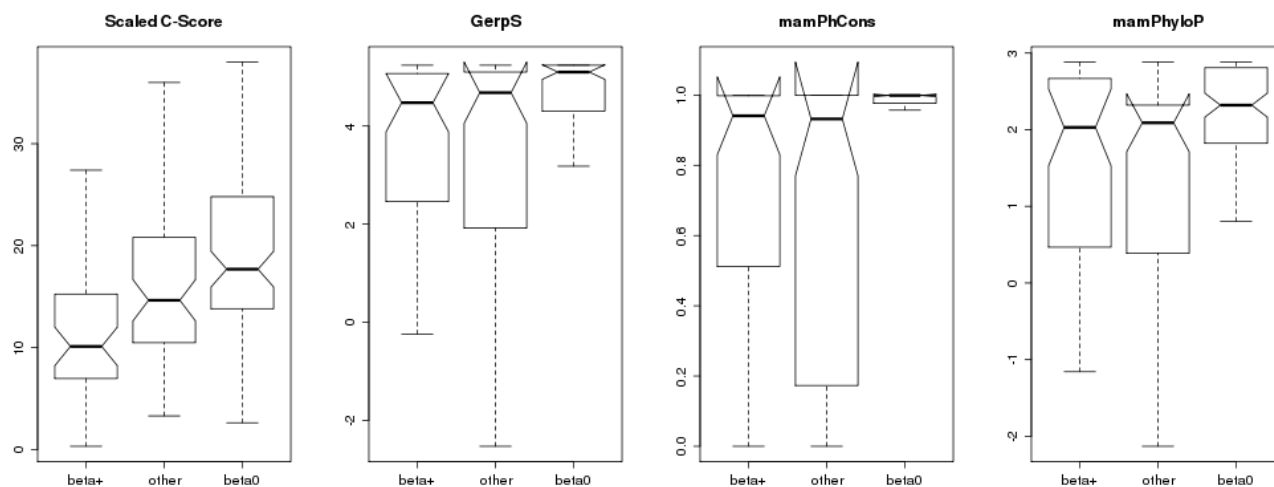

**Supplementary Figure 12:** Receiver operating characteristics (ROC) for discriminating pathogenic variants curated by the NIH ClinVar database<sup>3</sup> from apparently benign variants (AF  $\geq$  5%) selected from the Exome Sequencing Project<sup>4</sup> (ESP) to match the categorical consequences observed in the ClinVar pathogenic data set. The left panel shows results for a model which has been trained without PolyPhen as input features. Shown is a ROC plot equivalent to Fig. 3 (c), i.e. only variants for which all annotation scores are available are used. The right panel uses the same model/data presented in Fig. 3 (c), but excludes variants identified to overlap the PolyPhen-2 training data set (HumVar: <ftp://genetics.bwh.harvard.edu/pph2/training/training-2.2.2.tar.gz>; ClinVar pathogenic: 4157/8174, ESP: 3706/8174). In both panels, a matching number of variants for ESP and ClinVar pathogenic were used.

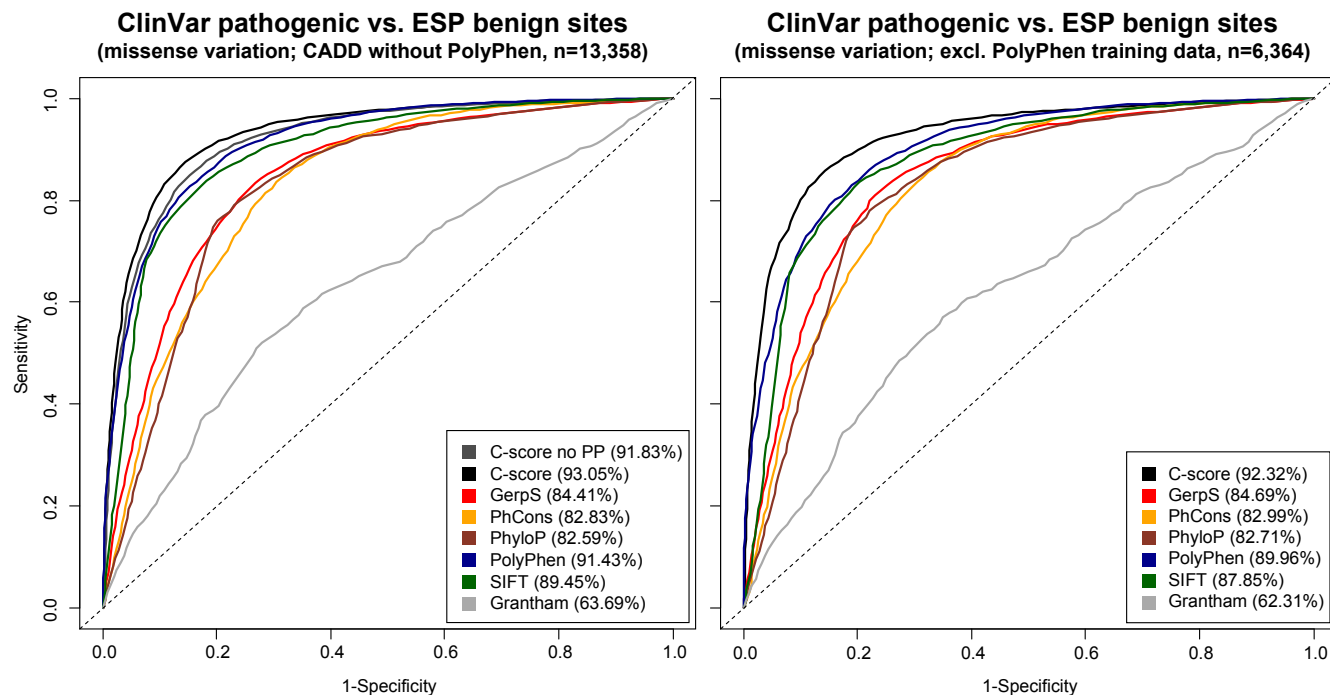

**Supplementary Figure 13:** Visual representation of the separation of the curated pathogenic mutations in the NIH ClinVar database (red, n=8174) and matched apparently benign (derived allele frequency of at least 5%) mutations in ESP with the same consequence values (blue, n=8174) for different scores. Gray blocks indicate missing values for the score under consideration. P-values are given for a Wilcoxon rank sum test with continuity correction.

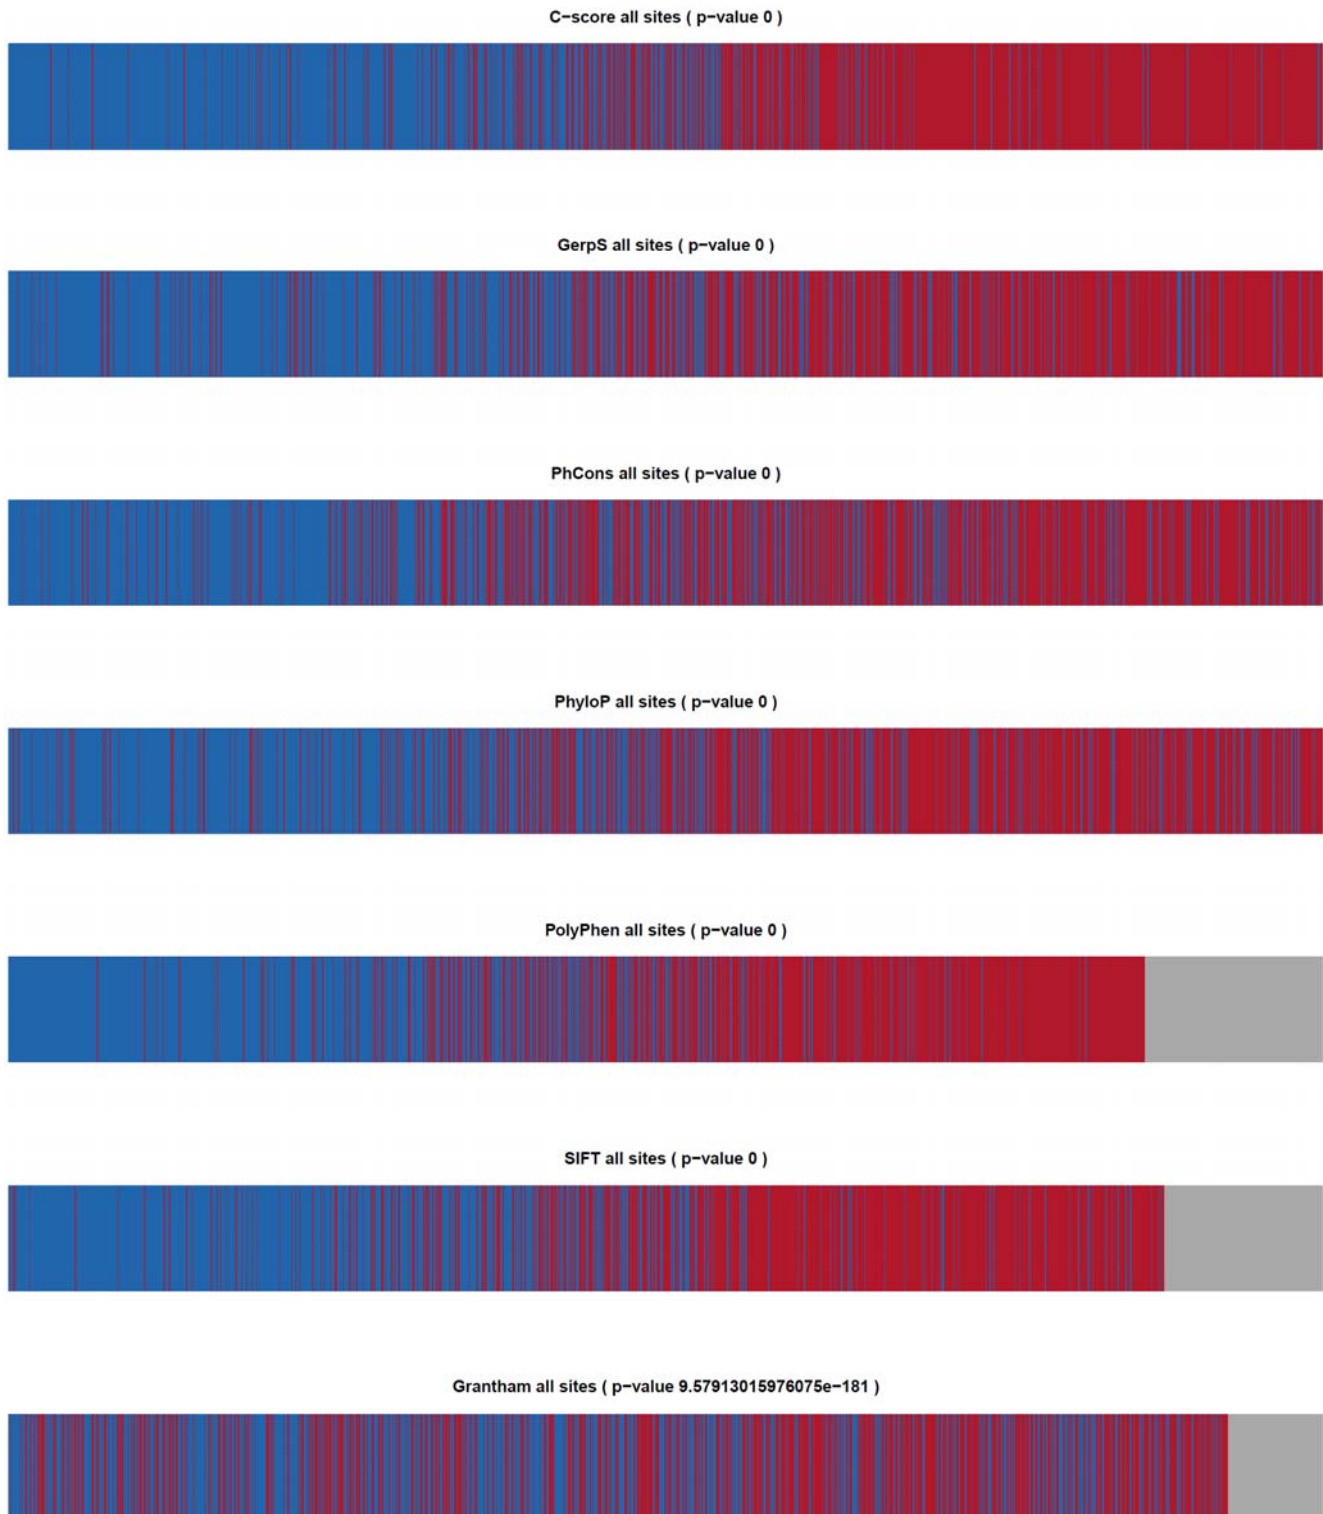



**Supplementary Figure 14:** Receiver operating characteristics (ROC) for discriminating pathogenic variants curated by the NIH ClinVar database<sup>3</sup> from variants selected from the Exome Sequencing Project<sup>4</sup> (ESP) to match the categorical consequences as well as the frequency observed in the ClinVar pathogenic data set to a  $10^{-3}$  precision. Using this precision level, ClinVar pathogenic variants without ESP frequency were matched to ESP variants of a frequency below  $<0.0005$ . A total of 9,965 ClinVar pathogenic variants were matched to the same number of ESP variants. In both panels, a matching number of variants for ESP and ClinVar pathogenic were used.

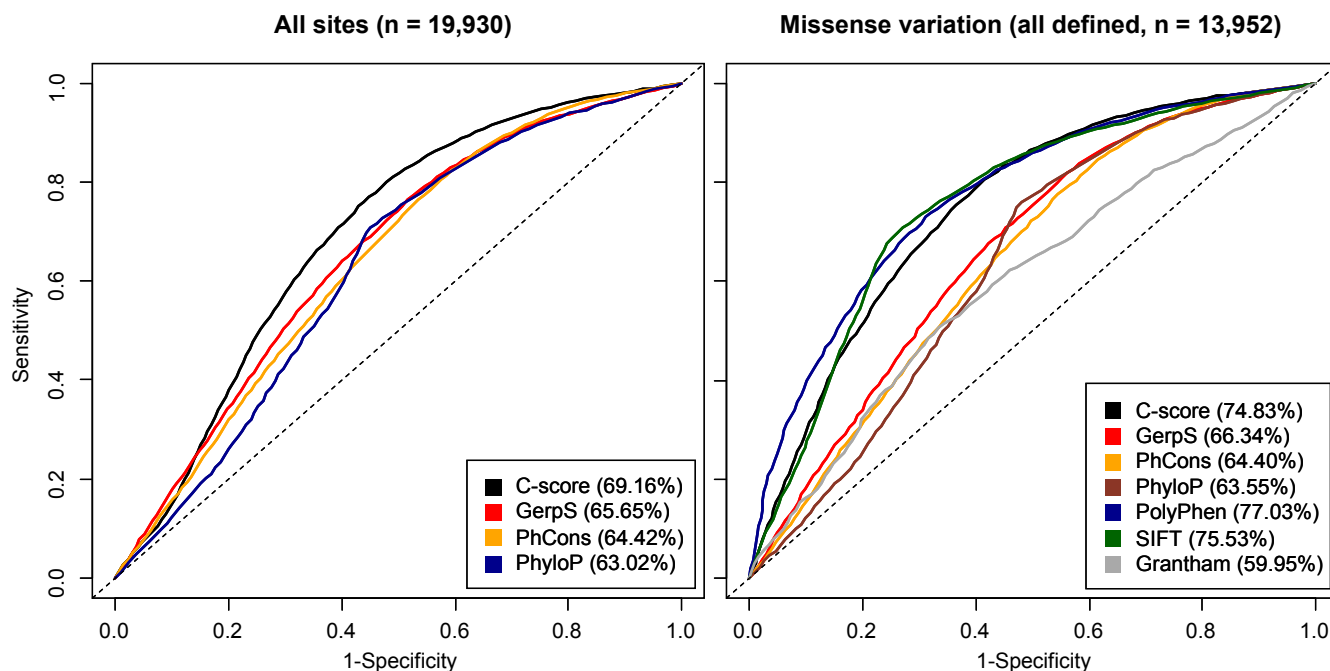

**Supplementary Figure 15:** Discriminating pathogenic variants curated by the NIH ClinVar database from ESP variants using alternative variant scores. Here we retrieved variant scores available from dbNSFP 2.0<sup>5</sup> and compared them to CADD. We retrieved 7,864 out of 8,174 ESP and 8,171 out of 8,174 ClinVar pathogenic variants used in Fig 3 and Supplementary Figure 10-12 from dbNSFP. The table on the left shows the difference in area under the curve (AUC) between CADD and each of the retrieved scores as well as the proportion of sites for which each of the scores is available. In all pairwise comparisons, the AUC of CADD is higher than for the alternative method; moreover most alternative methods are defined for only a subset of sites. The right figure displays the ROC curve for the subset of sites where all scores are available.

**ClinVar  
dbNSFP 2.0 scores vs CADD  
pairwise-defined sites**

|                               | Sites | $\Delta$ AUC |
|-------------------------------|-------|--------------|
| CADD vs.                      | 100%  | -            |
| PolyPhen2 HVAR <sup>1,2</sup> | 92%   | 0.40%        |
| phyloP                        | 100%  | 5.41%        |
| SIFT                          | 92%   | 5.97%        |
| GerpRS                        | 100%  | 7.66%        |
| MutationTaster <sup>2</sup>   | 85%   | 0.06%        |
| FATHMM                        | 77%   | 1.83%        |
| PolyPhen2 HDIV                | 92%   | 1.26%        |
| MutationAssessor              | 92%   | 1.97%        |
| 29wayLogOdds                  | 100%  | 4.56%        |
| LRT                           | 83%   | 5.66%        |
| LRT Omega                     | 83%   | 6.12%        |

<sup>1</sup> Scores reported by Ensembl VEP differ from dbNSFP

<sup>2</sup> Training data used for this method overlaps with NIH ClinVar database

**dbNSFP 2.0 ClinVar all defined  
(59% of sites; 3921 matched ESP vs. 5478 pathogenic)**

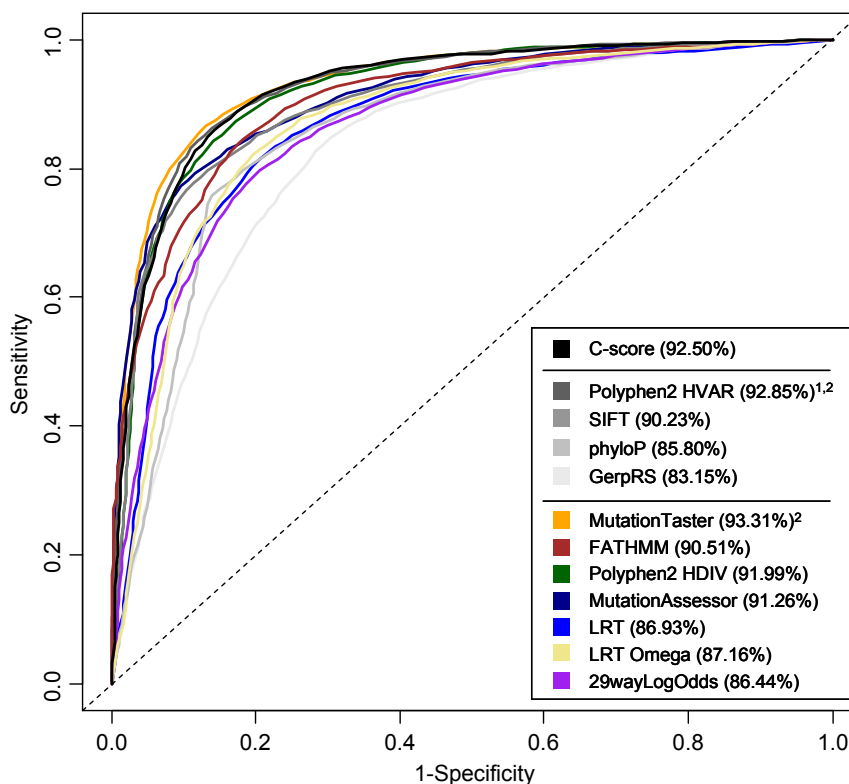

**Supplementary Figure 16:** Ranking of pathogenic ClinVar missense variants among all the missense variants identified by whole genome sequencing of eleven human individuals from diverse populations, similar to the left panel of Figure 4 in the main text. Note that ranks are defined based on the number of variants in the genome that score strictly below the variant of interest, with tied variants all assigned the same value (e.g., if there are 100 variants total and the highest scoring 5 variants are tied, then they would each be ranked at the 5<sup>th</sup>-percentile).

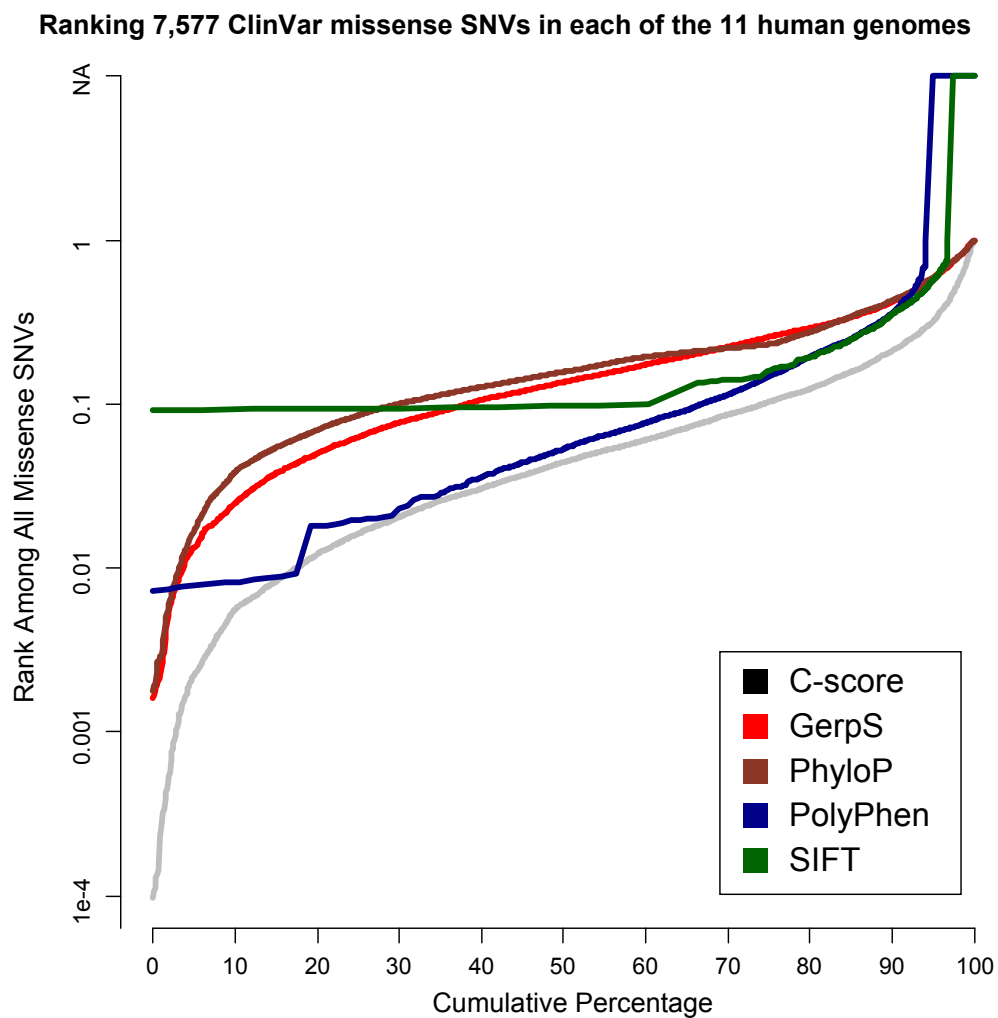

**Supplementary Figure 17:** Spearman (rank) and Pearson (linear) correlation between absolute expression fold change and the C-score for the respective substitution (panel A). Shown are two enhancers, ALDOB (777 variants) and ECR11 (1860 variants), and 210 promoter variants of the gene HBB. Combining all three data sets yields a Spearman rank correlation of 0.312 and p-value of  $1.91 \times 10^{-65}$ . Three conservation based methods (GerpS, mamPhCons, and mamPhyloP) yield lower Spearman rank correlations of 0.236 ( $1.85 \times 10^{-37}$ ), 0.240 ( $1.40 \times 10^{-38}$ ), and 0.193 ( $3.26 \times 10^{-25}$ ) for the combined data set (panel B).

**A**

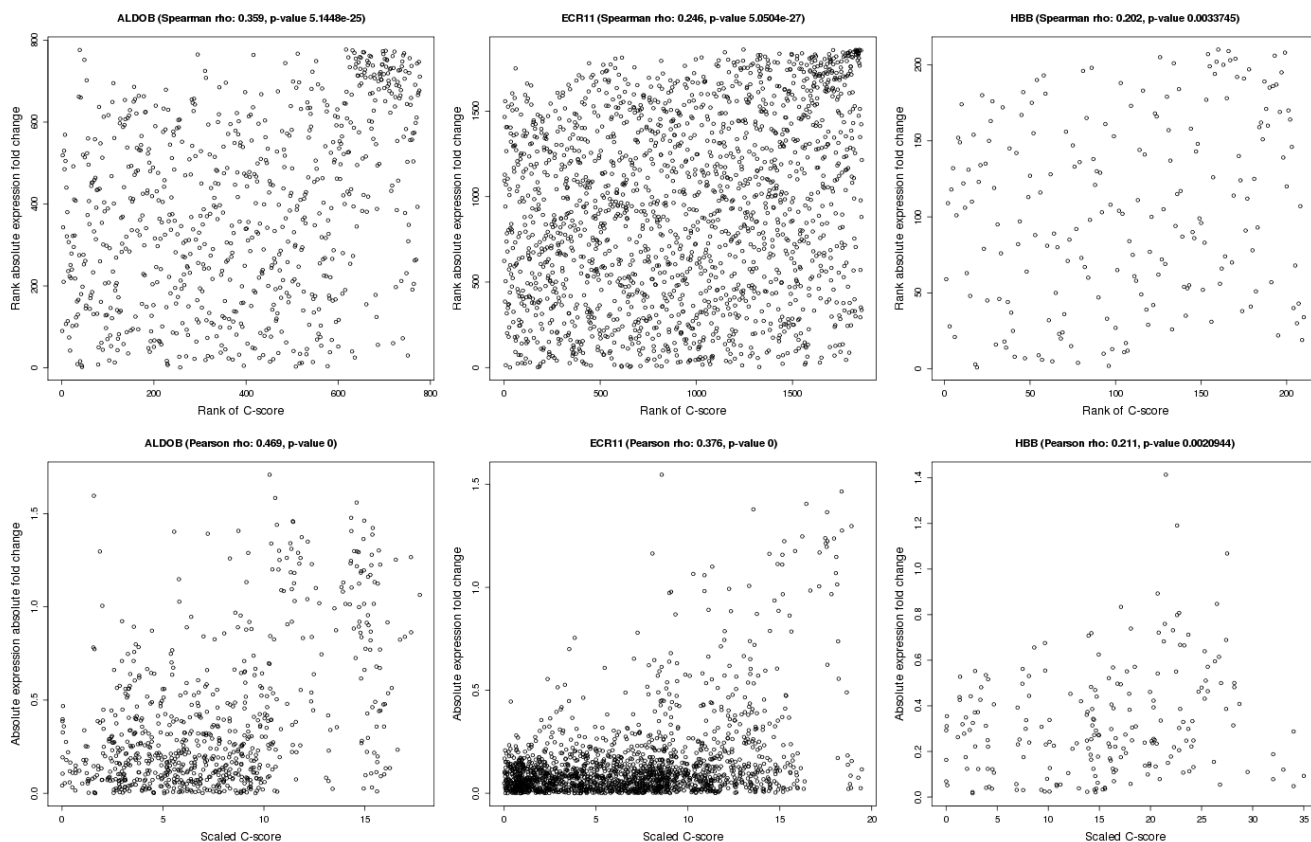

**B**

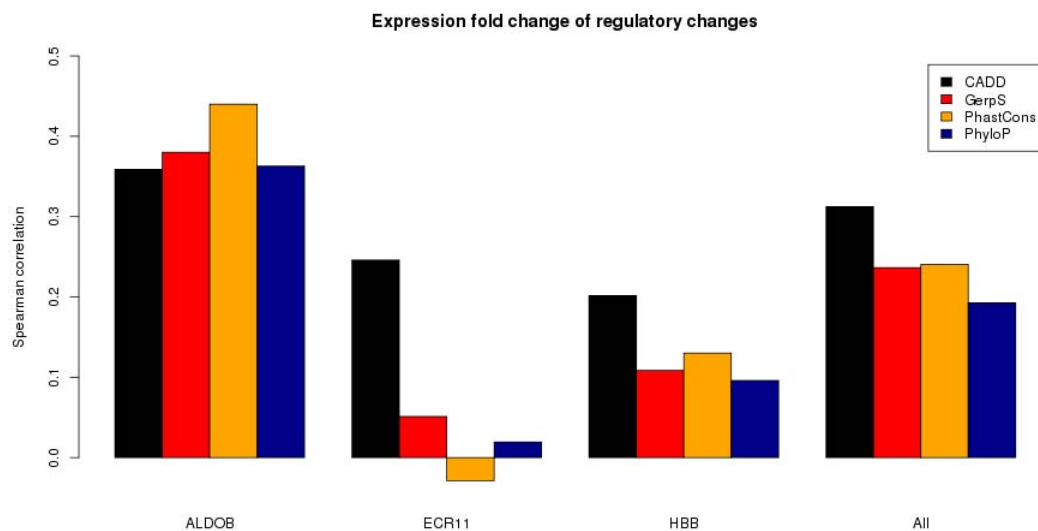

**Supplementary Figure 18:** Relationship of C-scores with the statistical significance of genome wide association studies.

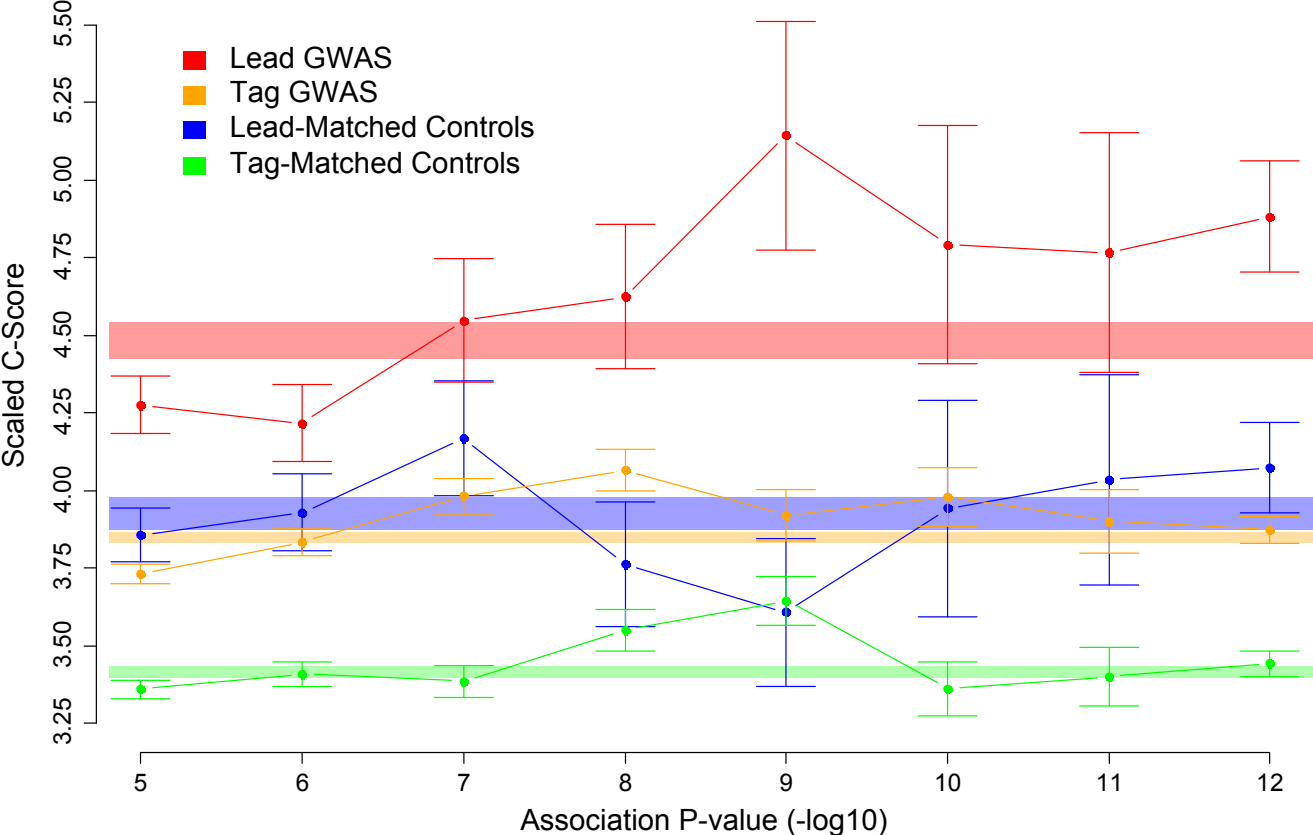

## SUPPLEMENTARY TABLES

**Supplementary Table 1:** Columns of the extended annotation tables. Parentheses around the column name indicate that the column is not used for model training or prediction of pathogenicity.

|    | <b>Name</b>      | <b>Type</b> | <b>Description</b>                                                                                                                                                                 |
|----|------------------|-------------|------------------------------------------------------------------------------------------------------------------------------------------------------------------------------------|
| 1  | (Chrom)          | factor      | Chromosome                                                                                                                                                                         |
| 2  | (Pos)            | int         | Position (1-based)                                                                                                                                                                 |
| 3  | Ref              | factor      | Reference allele                                                                                                                                                                   |
| 4  | (Anc)            | factor      | Ancestral (e.g. chimp like) base; defined using EPO 6 primate alignments                                                                                                           |
| 5  | Alt              | factor      | Observed allele                                                                                                                                                                    |
| 6  | Type             | factor      | Event type (SNV, DEL, INS)                                                                                                                                                         |
| 7  | Length           | int         | Number of inserted/deleted bases                                                                                                                                                   |
| 8  | isTv             | bool        | Is transversion?                                                                                                                                                                   |
| 9  | (isDerived)      | bool        | Observed allele is an evolutionary derived allele                                                                                                                                  |
| 10 | (AnnoType)       | factor      | CodingTranscript, Intergenic, MotifFeature, NonCodingTranscript, RegulatoryFeature, Transcript                                                                                     |
| 11 | Consequence      | factor      | 3PRIME_UTR, 5PRIME_UTR, DOWNSTREAM, INTERGENIC, INTRONIC, NON_SYNONYMOUS, SYNONYMOUS, REGULATORY, STOP_GAINED, STOP_LOST, SPLICE_SITE, CANONICAL_SPLICE_UPSTREAM, NONCODING_CHANGE |
| 12 | (ConsScore)      | int         | Custom deleterious score assigned to Consequence                                                                                                                                   |
| 13 | (ConsDetail)     | string      | Trimmed VEP consequence prior to simplification                                                                                                                                    |
| 14 | GC               | num         | Percent GC in a window of +/- 75bp                                                                                                                                                 |
| 15 | CpG              | num         | Percent CpG in a window of +/- 75bp                                                                                                                                                |
| 16 | (mapAbility20bp) | num         | Mapability of 20bp fragments determined by Duke                                                                                                                                    |
| 17 | (mapAbility35bp) | num         | Mapability of 35bp fragments determined by Duke                                                                                                                                    |
| 18 | (scoreSegDup)    | num         | UCSC segmental duplication similarity, indicate the percent identity to the highest-similarity segmental duplication event.                                                        |
| 19 | priPhCons        | num         | Primate PhastCons conservation score (excl. human)                                                                                                                                 |
| 20 | mamPhCons        | num         | Mammalian PhastCons conservation score (excl. human)                                                                                                                               |
| 21 | verPhCons        | num         | Vertebrate PhastCons conservation score (excl. human)                                                                                                                              |
| 22 | priPhyloP        | num         | Primate PhyloP score (excl. human)                                                                                                                                                 |
| 23 | mamPhyloP        | num         | Mammalian PhyloP score (excl. human)                                                                                                                                               |
| 24 | verPhyloP        | num         | Vertebrate PhyloP (excl. human)                                                                                                                                                    |
| 25 | GerpN            | num         | Neutral evolution score defined by GERP++                                                                                                                                          |
| 26 | GerpS            | num         | Rejected Substitution' score defined by GERP++                                                                                                                                     |
| 27 | GerpRS           | num         | Gerp element score                                                                                                                                                                 |
| 28 | GerpRSpval       | num         | Gerp element p-Value                                                                                                                                                               |
| 29 | bStatistic       | int         | Background selection score                                                                                                                                                         |
| 30 | EncExp           | num         | Maximum ENCODE expression value                                                                                                                                                    |
| 31 | EncH3K27Ac       | num         | Maximum ENCODE H3K27 acetylation level                                                                                                                                             |
| 32 | EncH3K4Me1       | num         | Maximum ENCODE H3K4 methylation level                                                                                                                                              |
| 33 | EncH3K4Me3       | num         | Maximum ENCODE H3K4 trimethylation level                                                                                                                                           |
| 34 | EncNucleo        | num         | Maximum of ENCODE Nucleosome position track score                                                                                                                                  |
| 35 | EncOCC           | int         | ENCODE open chromatin code                                                                                                                                                         |
| 36 | EncOCCombPVal    | num         | ENCODE combined p-Value (PHRED-scale) of Faire, Dnase, polII, CTCF, Myc evidence for open chromatin                                                                                |
| 37 | EncOCDnasePVal   | num         | p-Value (PHRED-scale) of Dnase evidence for open chromatin                                                                                                                         |
| 38 | EncOCFairePVal   | num         | p-Value (PHRED-scale) of Faire evidence for open chromatin                                                                                                                         |
| 39 | EncOCpolIIPVal   | num         | p-Value (PHRED-scale) of polII evidence for open chromatin                                                                                                                         |
| 40 | EncOCctcfPVal    | num         | p-Value (PHRED-scale) of CTCF evidence for open chromatin                                                                                                                          |
| 41 | EncOCmycPVal     | num         | p-Value (PHRED-scale) of Myc evidence for open chromatin                                                                                                                           |
| 42 | EncOCDnaseSig    | num         | Peak signal for Dnase evidence of open chromatin                                                                                                                                   |
| 43 | EncOCFaireSig    | num         | Peak signal for Faire evidence of open chromatin                                                                                                                                   |
| 44 | EncOCpolIISig    | num         | Peak signal for polII evidence of open chromatin                                                                                                                                   |
| 45 | EncOCctcfSig     | num         | Peak signal for CTCF evidence of open chromatin                                                                                                                                    |

|    | Name             | Type   | Description                                                                                                |
|----|------------------|--------|------------------------------------------------------------------------------------------------------------|
| 46 | EncOCmycSig      | num    | Peak signal for Myc evidence of open chromatin                                                             |
| 47 | Segway           | factor | Result of genomic segmentation algorithm                                                                   |
| 48 | tOverlapMotifs   | int    | Number of overlapping predicted TF motifs                                                                  |
| 49 | motifDist        | num    | Reference minus alternate allele difference in nucleotide frequency within an predicted overlapping motif  |
| 50 | motifECount      | int    | Total number of overlapping motifs                                                                         |
| 51 | motifEName       | string | Name of sequence motif the position overlaps                                                               |
| 52 | motifEHIPos      | bool   | Is the position considered highly informative for an overlapping motif by VEP                              |
| 53 | motifEScoreChng  | num    | VEP score change for the overlapping motif site                                                            |
| 54 | TFBS             | int    | Number of different overlapping ChIP transcription factor binding sites                                    |
| 55 | TFBSPeaks        | int    | Number of overlapping ChIP transcription factor binding site peaks summed over different cell types/tissue |
| 56 | TFBSPeaksMax     | int    | Maximum value of overlapping ChIP transcription factor binding site peaks across cell types/tissue         |
| 57 | (isKnownVariant) | bool   | Position is observed as being variable in 1000G or ESP?                                                    |
| 58 | (ESP_AF)         | num    | Average ESP frequency for alternative alleles at site                                                      |
| 59 | (ESP_AFR)        | num    | Average ESP African ancestry frequency                                                                     |
| 60 | (ESP_EUR)        | num    | Average ESP European ancestry frequency                                                                    |
| 61 | (TG_AF)          | num    | Average 1000 Genomes frequency for alternative alleles at site                                             |
| 62 | (TG_ASN)         | num    | Average 1000 Genomes Asian population frequency                                                            |
| 63 | (TG_AMR)         | num    | Average 1000 Genomes South American population frequency                                                   |
| 64 | (TG_AFR)         | num    | Average 1000 Genomes African population frequency                                                          |
| 65 | (TG_EUR)         | num    | Average 1000 Genomes European population frequency                                                         |
| 66 | minDistTSS       | int    | Distance to closest Transcribed Sequence Start (TSS)                                                       |
| 67 | minDistTSE       | int    | Distance to closest Transcribed Sequence End (TSE)                                                         |
| 68 | (GeneID)         | string | ENSEMBL GeneID                                                                                             |
| 69 | (FeatureID)      | string | ENSEMBL feature ID (Transcript ID or regulatory feature ID)                                                |
| 70 | (CCDS)           | string | Consensus Coding Sequence ID                                                                               |
| 71 | (GeneName)       | string | GeneName provided in ENSEMBL annotation                                                                    |
| 72 | cDNApos          | int    | Base position from transcription start                                                                     |
| 73 | relcDNApos       | num    | Relative position in transcript                                                                            |
| 74 | CDSpos           | int    | Base position from coding start                                                                            |
| 75 | relCDSpos        | num    | Relative position in coding sequence                                                                       |
| 76 | protPos          | int    | Amino acid position from coding start                                                                      |
| 77 | relProtPos       | num    | Relative position in protein codon                                                                         |
| 78 | Dst2Splice       | int    | Distance to splice site in 20bp; positive: exonic, negative: intronic                                      |
| 79 | Dst2SplType      | factor | Closest splice site is ACCEPTOR or DONOR                                                                   |
| 80 | (Exon)           | string | Exon number/Total number of exons                                                                          |
| 81 | (Intron)         | string | Intron number/Total number of exons                                                                        |
| 82 | oAA              | factor | Reference amino acid                                                                                       |
| 83 | nAA              | factor | Amino acid of observed variant                                                                             |
| 84 | Grantham         | int    | Grantham score: oAA,nAA                                                                                    |
| 85 | PolyPhenCat      | factor | PolyPhen category of change                                                                                |
| 86 | PolyPhenVal      | num    | PolyPhen score                                                                                             |
| 87 | SIFTcat          | factor | SIFT category of change                                                                                    |
| 88 | SIFTval          | num    | SIFT score                                                                                                 |

**Supplementary Table 2:** Imputation of missing values for model training and prediction. An asterisk (\*) indicates that a Boolean indicator variable was created in order to handle undefined values for that feature. "Dropped" indicates that a variant missing a value for this specific feature was not used for training.

| Name            | Training | Prediction | Name            | Training  | Prediction |
|-----------------|----------|------------|-----------------|-----------|------------|
| isTv            | dropped  | 0.5        | EncOCpollSig    | 0         |            |
| GC              | 0.418    |            | EncOCctcfSig    | 0         |            |
| CpG             | 0.024    |            | EncOCmycSig     | 0         |            |
| priPhCons       | 0.115    |            | Segway          | undefined |            |
| mamPhCons       | 0.079    |            | tOverlapMotifs  | 0         |            |
| verPhCons       | 0.094    |            | motifDist       | 0         |            |
| priPhyloP       | -0.033   |            | motifECount     | 0         |            |
| mamPhyloP       | -0.038   |            | motifEHIPos     | FALSE     |            |
| verPhyloP       | 0.017    |            | motifEScoreChng | 0         |            |
| GerpN           | 1.909    |            | TFBS            | 0         |            |
| GerpS           | -0.200   |            | TFBSPeaks       | 0         |            |
| GerpRS          | 0        |            | TFBSPeaksMax    | 0         |            |
| GerpRSpval      | 1        |            | minDistTSS      | 10000000  |            |
| bStatistic      | 800.261  |            | minDistTSE      | 10000000  |            |
| EncExp          | 0        |            | cDNApos*        | 0         |            |
| EncH3K27Ac      | 0        |            | relcDNApos*     | 0         |            |
| EncH3K4Me1      | 0        |            | CDSpos*         | 0         |            |
| EncH3K4Me3      | 0        |            | relCDSpos*      | 0         |            |
| EncNucleo       | 0        |            | protPos*        | 0         |            |
| EncOCC          | 5        |            | relProtPos*     | 0         |            |
| EncOCCombPVal   | 0        |            | Dst2Splice*     | 0         |            |
| EncOCCDNasePVal | 0        |            | Dst2SplType*    | undefined |            |
| EncOCFairePVal  | 0        |            | oAA             | undefined |            |
| EncOCpollIPVal  | 0        |            | nAA             | undefined |            |
| EncOCctcfPVal   | 0        |            | Grantham        | 0         |            |
| EncOCmycPVal    | 0        |            | PolyPhenCat     | undefined |            |
| EncOCCDNaseSig  | 0        |            | PolyPhenVal*    | 0         |            |
| EncOCFaireSig   | 0        |            | SIFTcat         | undefined |            |
|                 |          |            | SIFTval*        | 0         |            |



**Supplementary Table 3:** Univariate analyses for SNVs. The "Relevance" column reports the fraction of SNVs for which a particular feature is defined; each logistic regression model was only fit on the SNVs for which the corresponding feature is relevant. Depletion is defined as (fraction of observed sites among the x% predicted to be most deleterious)/(fraction of observed sites in the full data set); a value of 1 is expected by chance, and a small value indicates that the sites predicted to be most deleterious are predominantly simulated.

| Feature        | AUC    | Depletion 0.1% | Depletion 1% | Depletion 10% | Relevance |
|----------------|--------|----------------|--------------|---------------|-----------|
| SIFTval        | 0.8689 | 0.0891         | 0.0891       | 0.0891        | 0.0063    |
| PolyPhenVal    | 0.8682 | 0.0226         | 0.0226       | 0.0193        | 0.0063    |
| priPhCons      | 0.6571 | 0.0023         | 0.3562       | 0.4906        | 1.0000    |
| mamPhCons      | 0.5990 | 0.3531         | 0.4171       | 0.5779        | 1.0000    |
| verPhCons      | 0.5972 | 0.4070         | 0.4070       | 0.6014        | 1.0000    |
| verPhyloP      | 0.5657 | 0.0582         | 0.4727       | 0.7616        | 1.0000    |
| mamPhyloP      | 0.5634 | 0.4258         | 0.5272       | 0.7688        | 1.0000    |
| priPhyloP      | 0.5612 | 0.8771         | 0.8771       | 0.8749        | 1.0000    |
| GerpS          | 0.5551 | 0.3123         | 0.4728       | 0.7614        | 1.0000    |
| Dst2SpIi       | 0.5502 | 0.7041         | 0.7041       | 0.7256        | 0.0025    |
| Grantham       | 0.5469 | 1.0210         | 0.9588       | 0.6922        | 0.0063    |
| GerpN          | 0.5449 | 0.6522         | 0.7074       | 0.8477        | 1.0000    |
| relCDNApos     | 0.5310 | 1.0322         | 1.0558       | 0.9449        | 0.0242    |
| Segway         | 0.5216 | 0.6793         | 0.7808       | 0.9273        | 1.0000    |
| Ref            | 0.5194 | 0.9596         | 0.9596       | 0.9596        | 1.0000    |
| EncH3K27Ac     | 0.5184 | 0.8736         | 0.8751       | 0.9334        | 1.0000    |
| Consequence    | 0.5179 | 0.4171         | 0.6050       | 0.9010        | 1.0000    |
| EncH3K4Me1     | 0.5179 | 0.9538         | 0.9535       | 0.9438        | 1.0000    |
| EncH3K4Me3     | 0.5172 | 0.7077         | 0.7247       | 0.9255        | 1.0000    |
| GerpRS         | 0.5132 | 0.5954         | 0.7182       | 1.0000        | 1.0000    |
| GerpRSpval     | 0.5132 | 0.7931         | 0.7931       | 1.0000        | 1.0000    |
| EncExp         | 0.5125 | 0.6564         | 0.6975       | 0.9157        | 1.0000    |
| relCDSpos      | 0.5121 | 0.9791         | 0.9547       | 0.9594        | 0.0103    |
| relProtPos     | 0.5119 | 0.9341         | 0.9501       | 0.9581        | 0.0103    |
| Alt            | 0.5099 | 0.9792         | 0.9792       | 0.9792        | 1.0000    |
| EncNucleo      | 0.5084 | 1.0069         | 1.0055       | 0.9921        | 1.0000    |
| TFBS           | 0.5084 | 0.7392         | 0.7955       | 0.9341        | 1.0000    |
| TFBSPeaks      | 0.5084 | 0.7252         | 0.7914       | 0.9341        | 1.0000    |
| TFBSPeaksMax   | 0.5084 | 0.8046         | 0.8372       | 0.9260        | 1.0000    |
| EncOCCombPVal  | 0.5077 | 0.7751         | 0.7751       | 0.9288        | 1.0000    |
| EncOCDNaseSig  | 0.5077 | 0.7633         | 0.7652       | 0.9307        | 1.0000    |
| EncOCDNasePVal | 0.5074 | 0.7724         | 0.7720       | 1.0000        | 1.0000    |
| EncOCFaireSig  | 0.5074 | 0.8542         | 0.8542       | 0.9334        | 1.0000    |
| EncOCC         | 0.5073 | 0.9262         | 0.9262       | 0.9307        | 1.0000    |
| EncOCctcfSig   | 0.5072 | 0.8775         | 0.8588       | 1.0000        | 1.0000    |
| minDistTSS     | 0.5071 | 0.7543         | 0.8102       | 0.9365        | 1.0000    |
| EncOCmycSig    | 0.5070 | 0.8237         | 0.8360       | 1.0000        | 1.0000    |
| EncOCFairePVal | 0.5068 | 0.8680         | 0.8567       | 1.0000        | 1.0000    |
| EncOCpIIISig   | 0.5068 | 0.7102         | 0.7304       | 1.0000        | 1.0000    |
| tOverlapMotifs | 0.5060 | 0.8300         | 0.8915       | 1.0000        | 1.0000    |
| EncOCpIIIPVal  | 0.5058 | 0.7098         | 0.7312       | 1.0000        | 1.0000    |
| minDistTSE     | 0.5051 | 0.8447         | 0.8850       | 0.9574        | 1.0000    |
| EncOCctcfPVal  | 0.5050 | 0.8746         | 0.8679       | 1.0000        | 1.0000    |
| EncOCmycPVal   | 0.5046 | 0.7639         | 0.7960       | 1.0000        | 1.0000    |
| motifDist      | 0.5046 | 0.9267         | 0.9128       | 1.0003        | 1.0000    |
| oAA            | 0.5043 | 0.3443         | 0.5770       | 1.0000        | 1.0000    |
| nAA            | 0.5043 | 0.3055         | 0.5820       | 1.0000        | 1.0000    |
| CDSpos         | 0.5041 | 1.0965         | 0.9701       | 1.0033        | 0.0103    |
| protPos        | 0.5039 | 1.0370         | 1.0025       | 1.0038        | 0.0103    |
| PolyPhenCat    | 0.5036 | 0.0263         | 1.0000       | 1.0000        | 1.0000    |

| <b>Feature</b>  | <b>AUC</b> | <b>Depletion 0.1%</b> | <b>Depletion 1%</b> | <b>Depletion 10%</b> | <b>Relevance</b> |
|-----------------|------------|-----------------------|---------------------|----------------------|------------------|
| SIFTcat         | 0.5036     | 0.0506                | 1.0000              | 1.0000               | 1.0000           |
| Dst2SplE        | 0.5035     | 0.9178                | 0.9178              | 0.9476               | 0.0033           |
| bStatistic      | 0.5027     | 0.9724                | 0.9871              | 0.9641               | 1.0000           |
| isTv            | 0.5017     | 0.9976                | 0.9976              | 0.9976               | 1.0000           |
| CpG             | 0.5015     | 0.5015                | 0.6685              | 0.9623               | 1.0000           |
| Dst2SplType     | 0.5013     | 0.7670                | 1.0000              | 1.0000               | 1.0000           |
| GC              | 0.5009     | 0.5480                | 0.7572              | 0.9571               | 1.0000           |
| motifECount     | 0.5002     | 0.7905                | 1.0000              | 1.0000               | 1.0000           |
| motifEScoreChng | 0.5002     | 1.0000                | 1.0000              | 1.0000               | 1.0000           |
| motifEHIPos     | 0.5001     | 1.0000                | 1.0000              | 1.0000               | 1.0000           |
| cDNApos         | 0.4897     | 1.1382                | 1.1485              | 1.1202               | 0.0242           |

**Supplementary Table 4:** Univariate analyses for deletions. Details are as in Supplementary Table 3.

| Feature        | AUC    | Depletion 0.1% | Depletion 1% | Depletion 10% | Relevance |
|----------------|--------|----------------|--------------|---------------|-----------|
| Dst2SpIi       | 0.6353 | 0.5730         | 0.5730       | 0.5427        | 0.0030    |
| priPhyloP      | 0.6296 | 0.4771         | 0.4771       | 0.5073        | 1.0000    |
| GerpS          | 0.6162 | 0.3380         | 0.3387       | 0.5858        | 1.0000    |
| mamPhyloP      | 0.6133 | 0.2001         | 0.2432       | 0.5614        | 1.0000    |
| verPhyloP      | 0.6116 | 0.0345         | 0.2752       | 0.5692        | 1.0000    |
| EncNucleo      | 0.5977 | 0.7119         | 0.7070       | 0.7282        | 1.0000    |
| relcDNApos     | 0.5924 | 1.2878         | 1.1161       | 0.8412        | 0.0194    |
| CDSpos         | 0.5836 | 0.0000         | 0.5536       | 0.8203        | 0.0062    |
| protPos        | 0.5836 | 0.0000         | 0.5536       | 0.8203        | 0.0062    |
| GerpN          | 0.5796 | 0.5242         | 0.5725       | 0.7447        | 1.0000    |
| GC             | 0.5645 | 0.9369         | 0.8935       | 0.8055        | 1.0000    |
| Segway         | 0.5603 | 0.7591         | 0.7591       | 0.7908        | 1.0000    |
| priPhCons      | 0.5554 | 0.2538         | 0.3952       | 0.7772        | 1.0000    |
| cDNApos        | 0.5468 | 1.5190         | 1.0975       | 1.0545        | 0.0194    |
| EncH3K27Ac     | 0.5412 | 0.8593         | 0.8645       | 0.9271        | 1.0000    |
| Dst2SpIE       | 0.5394 | 0.9763         | 0.9763       | 0.8469        | 0.0026    |
| EncH3K4Me3     | 0.5355 | 0.8884         | 0.9370       | 0.9401        | 1.0000    |
| mamPhCons      | 0.5325 | 0.3724         | 0.3724       | 0.7980        | 1.0000    |
| EncH3K4Me1     | 0.5325 | 0.8012         | 0.8027       | 0.8977        | 1.0000    |
| verPhCons      | 0.5321 | 0.3954         | 0.3954       | 0.8047        | 1.0000    |
| bStatistic     | 0.5307 | 0.9484         | 0.9100       | 0.9209        | 1.0000    |
| relProtPos     | 0.5273 | 0.6405         | 1.3066       | 1.4265        | 0.0062    |
| relCDSpos      | 0.5266 | 1.0888         | 1.5264       | 1.4374        | 0.0062    |
| Consequence    | 0.5206 | 0.0009         | 0.4987       | 0.8861        | 1.0000    |
| Length         | 0.5184 | 0.9665         | 0.9665       | 0.9665        | 1.0000    |
| GerpRS         | 0.5155 | 0.8249         | 0.8239       | 1.0000        | 1.0000    |
| EncExp         | 0.5143 | 0.5264         | 0.6582       | 0.8957        | 1.0000    |
| minDistTSE     | 0.5104 | 0.9210         | 0.9075       | 0.9619        | 1.0000    |
| minDistTSS     | 0.5102 | 0.9245         | 0.9441       | 0.9597        | 1.0000    |
| EncOCC         | 0.5101 | 0.9304         | 0.9304       | 1.0000        | 1.0000    |
| EncOCCombPVal  | 0.5100 | 0.8953         | 0.8944       | 1.0000        | 1.0000    |
| EncOCDNaseSig  | 0.5098 | 0.8943         | 0.8919       | 1.0000        | 1.0000    |
| EncOCFaireSig  | 0.5094 | 0.9250         | 0.9357       | 1.0000        | 1.0000    |
| EncOCctcfSig   | 0.5091 | 0.9249         | 0.9312       | 1.0000        | 1.0000    |
| EncOCDNasePVal | 0.5085 | 0.8884         | 0.8893       | 1.0000        | 1.0000    |
| EncOCmycSig    | 0.5069 | 0.9049         | 0.9017       | 1.0000        | 1.0000    |
| EncOCFairePVal | 0.5068 | 0.8704         | 0.9183       | 1.0000        | 1.0000    |
| CpG            | 0.5066 | 0.9214         | 0.8646       | 0.9652        | 1.0000    |
| TFBS           | 0.5064 | 0.8366         | 0.8991       | 0.9452        | 1.0000    |
| TFBSPeaks      | 0.5064 | 0.8427         | 0.9035       | 0.9452        | 1.0000    |
| TFBSPeaksMax   | 0.5064 | 0.9240         | 0.9021       | 0.9430        | 1.0000    |
| tOverlapMotifs | 0.5063 | 0.9940         | 0.9940       | 0.9940        | 1.0000    |
| EncOCpolIISig  | 0.5054 | 0.9158         | 0.9257       | 1.0000        | 1.0000    |
| EncOCpolIIPVal | 0.5029 | 0.9260         | 0.9258       | 1.0000        | 1.0000    |
| EncOCctcfPVal  | 0.5027 | 0.9609         | 0.9451       | 1.0000        | 1.0000    |
| EncOCmycPVal   | 0.5027 | 0.9079         | 0.9145       | 1.0000        | 1.0000    |
| Dst2SpIType    | 0.5013 | 0.7278         | 1.0000       | 1.0000        | 1.0000    |
| motifDist      | 0.4976 | 0.0000         | 0.0000       | 1.0294        | 1.0000    |
| GerpRSpval     | 0.4844 | 1.0165         | 1.0165       | 1.0165        | 1.0000    |

**Supplementary Table 5:** Univariate analyses for insertions. Details are as in Supplementary Table 3.

| Feature        | AUC    | Depletion 0.1% | Depletion 1% | Depletion 10% | Relevance |
|----------------|--------|----------------|--------------|---------------|-----------|
| CDSpos         | 0.6320 | 0.0000         | 0.2894       | 0.4920        | 0.0063    |
| protPos        | 0.6320 | 0.0000         | 0.2894       | 0.4896        | 0.0063    |
| Dst2SpIi       | 0.6281 | 0.5488         | 0.5488       | 0.5610        | 0.0030    |
| GerpN          | 0.6153 | 0.5513         | 0.5891       | 0.7210        | 1.0000    |
| EncNucleo      | 0.6062 | 0.8609         | 0.8374       | 0.7780        | 1.0000    |
| priPhyloP      | 0.5952 | 0.5622         | 0.5622       | 0.6142        | 1.0000    |
| Segway         | 0.5888 | 0.7216         | 0.7216       | 0.7436        | 1.0000    |
| relcDNApos     | 0.5847 | 1.5408         | 1.2444       | 0.9541        | 0.0193    |
| GC             | 0.5559 | 1.2568         | 1.1499       | 0.8666        | 1.0000    |
| EncH3K27Ac     | 0.5538 | 0.8734         | 0.8709       | 0.9178        | 1.0000    |
| EncH3K4Me1     | 0.5473 | 0.7663         | 0.7689       | 0.8571        | 1.0000    |
| EncH3K4Me3     | 0.5437 | 0.9328         | 0.9736       | 0.9858        | 1.0000    |
| cDNApos        | 0.5398 | 1.9463         | 1.3563       | 1.1026        | 0.0193    |
| GerpS          | 0.5313 | 0.3399         | 0.4990       | 0.8027        | 1.0000    |
| Dst2SpIE       | 0.5312 | 0.8533         | 0.8533       | 0.8733        | 0.0025    |
| bStatistic     | 0.5199 | 1.0957         | 0.9899       | 0.9638        | 1.0000    |
| Consequence    | 0.5197 | 0.0000         | 0.5237       | 0.9674        | 1.0000    |
| GerpRSpval     | 0.5189 | 0.6598         | 0.6598       | 1.0000        | 1.0000    |
| GerpRS         | 0.5188 | 0.8275         | 0.7771       | 1.0000        | 1.0000    |
| priPhCons      | 0.5181 | 0.1339         | 0.3709       | 0.7795        | 1.0000    |
| motifDist      | 0.5176 | 0.9825         | 0.9825       | 0.9825        | 1.0000    |
| tOverlapMotifs | 0.5164 | 0.9825         | 0.9825       | 0.9825        | 1.0000    |
| minDistTSE     | 0.5149 | 0.9628         | 0.9209       | 0.9544        | 1.0000    |
| minDistTSS     | 0.5146 | 0.9645         | 0.9706       | 0.9665        | 1.0000    |
| EncExp         | 0.5123 | 0.5704         | 0.6950       | 0.9019        | 1.0000    |
| EncOCC         | 0.5086 | 0.8909         | 0.8909       | 1.0000        | 1.0000    |
| EncOCCombPVal  | 0.5085 | 0.9622         | 0.9621       | 1.0000        | 1.0000    |
| EncOCFaireSig  | 0.5082 | 0.9451         | 0.9573       | 1.0000        | 1.0000    |
| EncOCDNaseSig  | 0.5081 | 0.9375         | 0.9625       | 1.0000        | 1.0000    |
| TFBS           | 0.5080 | 0.9313         | 0.9196       | 0.9297        | 1.0000    |
| TFBSPeaks      | 0.5080 | 0.9509         | 0.9327       | 0.9297        | 1.0000    |
| TFBSPeaksMax   | 0.5080 | 0.9438         | 0.9194       | 0.9284        | 1.0000    |
| EncOCctcfSig   | 0.5071 | 0.9804         | 0.9762       | 1.0000        | 1.0000    |
| EncOCDNasePVal | 0.5068 | 0.9476         | 0.9602       | 1.0000        | 1.0000    |
| Length         | 0.5062 | 0.9532         | 0.9760       | 0.9767        | 1.0000    |
| EncOCFairePVal | 0.5062 | 0.9421         | 0.9531       | 1.0000        | 1.0000    |
| EncOCmycSig    | 0.5052 | 0.9928         | 0.9654       | 1.0000        | 1.0000    |
| CpG            | 0.5036 | 1.0043         | 1.0043       | 1.0043        | 1.0000    |
| EncOCpolIISig  | 0.5035 | 0.9800         | 0.9783       | 1.0000        | 1.0000    |
| EncOCpolIIPVal | 0.5017 | 0.9917         | 0.9799       | 1.0000        | 1.0000    |
| mamPhyloP      | 0.5015 | 0.2411         | 0.4918       | 0.8776        | 1.0000    |
| EncOCmycPVal   | 0.5015 | 0.9946         | 0.9689       | 1.0000        | 1.0000    |
| Dst2SpIType    | 0.5013 | 0.7154         | 1.0000       | 1.0000        | 1.0000    |
| EncOCctcfPVal  | 0.5008 | 0.9847         | 0.9841       | 1.0000        | 1.0000    |
| verPhyloP      | 0.4996 | 0.0445         | 0.5007       | 0.9020        | 1.0000    |
| relProtPos     | 0.4584 | 0.7236         | 0.8905       | 1.5987        | 0.0063    |
| relCDSpos      | 0.4580 | 1.2186         | 1.0524       | 1.5874        | 0.0063    |
| verPhCons      | 0.4530 | 0.4625         | 0.4625       | 0.8768        | 1.0000    |
| mamPhCons      | 0.4520 | 0.3904         | 0.4270       | 0.8550        | 1.0000    |

**Supplementary Table 6:** Depletion of observed SNVs in each consequence bin, computed as (fraction of observed sites in a given consequence bin)/(fraction of observed sites in the full data set); the denominator is 1/2. Values presented are averages across ten different training data samples, followed by the range. A small value indicates a consequence bin containing fewer observed SNVs than expected by chance. The numbers of observed and simulated SNVs within each consequence bin are also reported. We define "canonical splice site" as a site in the two-base region at the 5' end of an intron or in the two-base region at the 3' end of an intron. Sites that are within 1-3 bases of the exon or 3-8 bases of the intron are defined as "non-canonical splice sites".

| Consequence               | Depletion                 | Number of Observed             | Number of Simulated            |
|---------------------------|---------------------------|--------------------------------|--------------------------------|
| Stop gained               | 0.0535<br>[0.0517-0.0555] | 182.3<br>[176-190]             | 6633.7<br>[6510-6731]          |
| Non-synonymous            | 0.4358<br>[0.434-0.4375]  | 36172.5<br>[36097-36240]       | 129850.5<br>[129426-130438]    |
| Canonical splice site     | 0.544<br>[0.5292-0.5553]  | 1575.9<br>[1560-1605]          | 4218.5<br>[4139-4342]          |
| Non-canonical splice site | 0.8358<br>[0.8298-0.8416] | 12542.0<br>[12444-12613]       | 17468.8<br>[17318-17682]       |
| Synonymous                | 0.8735<br>[0.8725-0.8747] | 41959.4<br>[41901-42026]       | 54110.6<br>[53956-54240]       |
| Other                     | 0.8831<br>[0.5714-1.0000] | 11.9<br>[10-14]                | 15.4<br>[11-25]                |
| 5'UTR                     | 0.8887<br>[0.8837-0.8936] | 7498.1<br>[7454-7528]          | 9377.1<br>[9279-9467]          |
| 3'UTR                     | 0.8945<br>[0.8919-0.8982] | 60312.1<br>[60245-60398]       | 74534.2<br>[74072-74844]       |
| Regulatory                | 0.9383<br>[0.9377-0.939]  | 1142566.7<br>[1141761-1143322] | 1292867.1<br>[1291932-1294521] |
| Noncoding                 | 0.9688<br>[0.966-0.9710]  | 101110.7<br>[100933-101209]    | 107629.2<br>[107212-108339]    |
| Stop lost                 | 0.9707<br>[0.9254-1.0183] | 306.0<br>[295-317]             | 325.1<br>[295-360]             |
| Intronic                  | 0.9982<br>[0.9979-0.9984] | 5265927.8<br>[5265044-5266525] | 5285257.9<br>[5283256-5287168] |
| Upstream                  | 1.0085<br>[1.0079-1.009]  | 803159.2<br>[802546-803744]    | 789686.7<br>[788488-790571]    |
| Downstream                | 1.0130<br>[1.0123-1.0142] | 835759.4<br>[835447-836171]    | 814265.3<br>[812726-815121]    |
| Intergenic                | 1.0295<br>[1.0292-1.0297] | 4832215.0<br>[4831829-4832961] | 4555058.9<br>[4553648-4558938] |

**Supplementary Table 7:** Interaction of SNV consequence and cDNA position. A logistic regression model was fit in order to predict whether a SNV within a cDNA is observed or simulated, based on the Consequence label, the relative position of the variant along the cDNA (from 0 to 1), and an interaction between those two terms. Coefficients, standard errors, and p-values for the interactions are shown. A smaller coefficient value indicates a Consequence bin that tends to be less associated with deleteriousness when it occurs later in the cDNA. A larger coefficient value indicates the opposite.

| <b>Interaction of terms</b> | <b>Coefficient</b> | <b>Standard Error</b> | <b>P-value</b> |
|-----------------------------|--------------------|-----------------------|----------------|
| Synonymous : relcDNApos     | -0.236989          | 0.030483              | 7.57E-15       |
| Non-synonymous : relcDNApos | -0.231859          | 0.02824               | <2.00E-16      |
| Non-coding : relcDNApos     | -0.062340          | 0.014907              | 2.89E-05       |
| 3'UTR : relcDNApos          | 0.094524           | 0.03112               | 2.39E-03       |
| 5'UTR : relcDNApos          | -0.082529          | 0.09231               | 3.71E-01       |

**Supplementary Table 8:** Distribution of 8,594,355,672 scaled C-scores for all possible GRCh37/hg19 single nucleotide substitutions across categorical variant consequence bins. Consequences are obtained from Ensembl Variant Effect Predictor<sup>6</sup> output (see Supplemental Methods), e.g. "noncoding" refers to changes in annotated non-coding transcripts.

| Cscore | 3'UTR   | 5'UTR  | REG.     | DOWN-STREAM | UP-STREAM | INTERGENIC | INTRONIC  | NON-CODING | NON SYN. | SPLICE SITE | CAN. SPLICE | STOP GAINED | STOP LOST | SYN.    | UN-KNOWN |
|--------|---------|--------|----------|-------------|-----------|------------|-----------|------------|----------|-------------|-------------|-------------|-----------|---------|----------|
| 0      | 3161866 | 330813 | 37939683 | 73348361    | 73590638  | 407672651  | 328047712 | 4459624    | 2110601  | 881401      | 108085      | 1193        | 39177     | 2056375 | 68       |
| 1      | 3238451 | 612964 | 86419030 | 113683046   | 118533970 | 632115956  | 609242979 | 6728909    | 1106326  | 969976      | 115878      | 1639        | 12647     | 1387350 | 329      |
| 2      | 3834482 | 659012 | 91809665 | 80743996    | 86611063  | 486053079  | 490929744 | 8842549    | 1105967  | 855388      | 119204      | 2243        | 10171     | 1347548 | 353      |
| 3      | 4014908 | 619439 | 87547862 | 60942530    | 66445014  | 364741617  | 395624281 | 9703947    | 1225289  | 813249      | 116540      | 3285        | 9467      | 1424350 | 266      |
| 4      | 4115694 | 553874 | 81696634 | 45852421    | 50766359  | 267512166  | 327639183 | 8811643    | 1325925  | 752774      | 101921      | 4280        | 8833      | 1397508 | 183      |
| 5      | 4400312 | 493334 | 74406774 | 34147232    | 38455234  | 195124641  | 268776158 | 7327896    | 1432299  | 695147      | 87790       | 5617        | 8632      | 1328363 | 186      |
| 6      | 4638458 | 442735 | 66066246 | 25857190    | 29553557  | 144502769  | 218178984 | 5905154    | 1573335  | 656477      | 77892       | 7338        | 9130      | 1326233 | 257      |
| 7      | 4589164 | 394771 | 56431060 | 19879370    | 23049608  | 108740103  | 173670713 | 4654901    | 1788639  | 637205      | 75243       | 9966        | 9447      | 1483042 | 310      |
| 8      | 4149162 | 344524 | 46474217 | 15783234    | 18524763  | 84418999   | 136531772 | 3622450    | 2142848  | 649732      | 77176       | 14219       | 10456     | 1974399 | 347      |
| 9      | 3387782 | 288339 | 36568016 | 12825946    | 15150814  | 67011125   | 104973026 | 2774060    | 2644344  | 684583      | 84561       | 21332       | 11881     | 3063050 | 455      |
| 10     | 2747026 | 231558 | 28421785 | 10483435    | 12431536  | 53688610   | 80013544  | 2153289    | 3242526  | 726868      | 97794       | 30692       | 13164     | 3497986 | 519      |
| 11     | 2369855 | 191443 | 23055260 | 8487544     | 10076288  | 42662242   | 61276000  | 1757290    | 3792096  | 767020      | 114443      | 42801       | 14637     | 1708895 | 513      |
| 12     | 2057428 | 173269 | 20097758 | 6886775     | 8190337   | 33942828   | 48176823  | 1475496    | 4241259  | 782006      | 131077      | 56051       | 15611     | 458580  | 622      |
| 13     | 1553179 | 157199 | 16061746 | 5346642     | 6331203   | 25769616   | 36861356  | 1170351    | 4348623  | 668584      | 134386      | 65484       | 16049     | 144014  | 599      |
| 14     | 1033084 | 147016 | 11273484 | 4453184     | 5245034   | 20844875   | 30557758  | 1017908    | 4598206  | 487719      | 142427      | 76600       | 16784     | 38734   | 471      |
| 15     | 501913  | 118029 | 5864529  | 3676732     | 4286899   | 16770897   | 25068592  | 804893     | 4614726  | 259572      | 150437      | 85332       | 16908     | 10859   | 371      |
| 16     | 176837  | 81707  | 2513938  | 3174835     | 3647838   | 14184259   | 21219193  | 444887     | 4602697  | 104741      | 169092      | 94342       | 15989     | 3835    | 306      |
| 17     | 41423   | 41428  | 959574   | 2555597     | 2891148   | 11262557   | 16856999  | 143750     | 4194599  | 32192       | 177413      | 93437       | 13298     | 1137    | 308      |
| 18     | 11072   | 18306  | 358705   | 2071691     | 2326296   | 9179858    | 13666560  | 44584      | 3846651  | 10896       | 185200      | 91565       | 10248     | 282     | 243      |
| 19     | 3395    | 7038   | 126323   | 1621225     | 1808213   | 7375685    | 10231430  | 15379      | 3311593  | 3956        | 179075      | 83522       | 7314      | 111     | 209      |
| 20     | 1038    | 3042   | 47390    | 1283920     | 1434129   | 6171381    | 7266281   | 5912       | 2820221  | 1554        | 162911      | 76566       | 5048      | 31      | 174      |
| 21     | 338     | 1144   | 18577    | 984364      | 1113152   | 5059403    | 4810864   | 2293       | 2305551  | 684         | 135640      | 67107       | 3424      | 13      | 150      |
| 22     | 145     | 604    | 9254     | 970089      | 1121934   | 5346479    | 3961471   | 1440       | 2459159  | 377         | 142562      | 75544       | 3122      | 5       | 147      |
| 23     | 52      | 134    | 3254     | 630317      | 754916    | 3716972    | 2108482   | 576        | 1779768  | 155         | 95248       | 58729       | 1837      | 1       | 101      |
| 24     | 18      | 68     | 1919     | 609388      | 754856    | 3811039    | 1610284   | 402        | 1942521  | 64          | 90642       | 68587       | 1709      | 2       | 110      |
| 25     | 16      | 42     | 733      | 392896      | 503040    | 2583765    | 775208    | 200        | 1408430  | 25          | 54657       | 53573       | 974       | 0       | 83       |
| 26     | 5       | 37     | 417      | 379567      | 499771    | 2588288    | 534293    | 154        | 1497452  | 12          | 46453       | 62689       | 1007      | 0       | 97       |
| 27     | 4       | 15     | 187      | 243789      | 330204    | 1718783    | 235170    | 52         | 1039876  | 15          | 24734       | 49289       | 701       | 2       | 64       |
| 28     | 2       | 10     | 176      | 228794      | 327353    | 1691180    | 157382    | 41         | 1055903  | 6           | 18841       | 59408       | 653       | 1       | 81       |
| 29     | 1       | 5      | 85       | 143710      | 215904    | 1099622    | 73225     | 11         | 708234   | 1           | 9007        | 48197       | 458       | 0       | 55       |
| 30     | 0       | 4      | 37       | 78294       | 123664    | 611766     | 33249     | 8          | 404787   | 1           | 3920        | 32034       | 250       | 0       | 33       |
| 31     | 1       | 4      | 24       | 60673       | 100362    | 487044     | 23741     | 5          | 329973   | 0           | 2444        | 29631       | 203       | 0       | 25       |
| 32     | 1       | 2      | 36       | 90234       | 158661    | 719107     | 32474     | 5          | 514880   | 0           | 2820        | 56773       | 337       | 0       | 55       |
| 33     | 0       | 1      | 29       | 65349       | 131342    | 534729     | 23467     | 2          | 430477   | 0           | 1534        | 64108       | 304       | 0       | 44       |
| 34     | 0       | 1      | 26       | 46723       | 107210    | 370912     | 17890     | 1          | 368280   | 0           | 891         | 81702       | 317       | 0       | 41       |
| 35     | 0       | 0      | 22       | 31442       | 83761     | 213449     | 14498     | 1          | 319209   | 1           | 687         | 126136      | 301       | 0       | 59       |
| 36     | 0       | 0      | 6        | 15431       | 49514     | 81818      | 9892      | 0          | 204389   | 0           | 659         | 265179      | 222       | 0       | 62       |
| 37     | 0       | 0      | 1        | 2746        | 7009      | 14458      | 1737      | 0          | 22560    | 0           | 138         | 449405      | 102       | 0       | 26       |
| 38     | 0       | 0      | 0        | 84          | 232       | 991        | 25        | 0          | 363      | 0           | 0           | 393997      | 11        | 0       | 17       |
| 39     | 0       | 0      | 0        | 0           | 3         | 11         | 1         | 0          | 5        | 0           | 0           | 314299      | 2         | 0       | 11       |
| 40     | 0       | 0      | 0        | 0           | 0         | 0          | 0         | 0          | 0        | 0           | 0           | 249662      | 4         | 0       | 17       |
| 41     | 0       | 0      | 0        | 0           | 0         | 0          | 0         | 0          | 0        | 0           | 0           | 198315      | 3         | 0       | 11       |
| 42     | 0       | 0      | 0        | 0           | 0         | 0          | 0         | 0          | 0        | 0           | 0           | 157537      | 1         | 0       | 1        |
| 43     | 0       | 0      | 0        | 0           | 0         | 0          | 0         | 0          | 0        | 0           | 0           | 125132      | 5         | 0       | 0        |
| 44     | 0       | 0      | 0        | 0           | 0         | 0          | 0         | 0          | 0        | 0           | 0           | 99393       | 0         | 0       | 8        |
| 45     | 0       | 0      | 0        | 0           | 0         | 0          | 0         | 0          | 0        | 0           | 0           | 78957       | 0         | 0       | 0        |
| 46     | 0       | 0      | 0        | 0           | 0         | 0          | 0         | 0          | 0        | 0           | 0           | 62717       | 0         | 0       | 0        |
| 47     | 0       | 0      | 0        | 0           | 0         | 0          | 0         | 0          | 0        | 0           | 0           | 49818       | 0         | 0       | 0        |
| 48     | 0       | 0      | 0        | 0           | 0         | 0          | 0         | 0          | 0        | 0           | 0           | 39572       | 0         | 0       | 0        |
| 49     | 0       | 0      | 0        | 0           | 0         | 0          | 0         | 0          | 0        | 0           | 0           | 31433       | 0         | 0       | 0        |
| 50     | 0       | 0      | 0        | 0           | 0         | 0          | 0         | 0          | 0        | 0           | 0           | 24968       | 0         | 0       | 0        |

|    |   |   |   |   |   |   |   |   |   |   |   |   |   |       |   |   |   |
|----|---|---|---|---|---|---|---|---|---|---|---|---|---|-------|---|---|---|
| 51 | 0 | 0 | 0 | 0 | 0 | 0 | 0 | 0 | 0 | 0 | 0 | 0 | 0 | 19833 | 0 | 0 | 0 |
| 52 | 0 | 0 | 0 | 0 | 0 | 0 | 0 | 0 | 0 | 0 | 0 | 0 | 0 | 15754 | 0 | 0 | 0 |
| 53 | 0 | 0 | 0 | 0 | 0 | 0 | 0 | 0 | 0 | 0 | 0 | 0 | 0 | 12514 | 0 | 0 | 0 |
| 54 | 0 | 0 | 0 | 0 | 0 | 0 | 0 | 0 | 0 | 0 | 0 | 0 | 0 | 9940  | 0 | 0 | 0 |
| 55 | 0 | 0 | 0 | 0 | 0 | 0 | 0 | 0 | 0 | 0 | 0 | 0 | 0 | 7896  | 0 | 0 | 0 |
| 56 | 0 | 0 | 0 | 0 | 0 | 0 | 0 | 0 | 0 | 0 | 0 | 0 | 0 | 6271  | 0 | 0 | 0 |
| 57 | 0 | 0 | 0 | 0 | 0 | 0 | 0 | 0 | 0 | 0 | 0 | 0 | 0 | 4982  | 0 | 0 | 0 |
| 58 | 0 | 0 | 0 | 0 | 0 | 0 | 0 | 0 | 0 | 0 | 0 | 0 | 0 | 3957  | 0 | 0 | 0 |
| 59 | 0 | 0 | 0 | 0 | 0 | 0 | 0 | 0 | 0 | 0 | 0 | 0 | 0 | 3144  | 0 | 0 | 0 |
| 60 | 0 | 0 | 0 | 0 | 0 | 0 | 0 | 0 | 0 | 0 | 0 | 0 | 0 | 2496  | 0 | 0 | 0 |
| 61 | 0 | 0 | 0 | 0 | 0 | 0 | 0 | 0 | 0 | 0 | 0 | 0 | 0 | 1984  | 0 | 0 | 0 |
| 62 | 0 | 0 | 0 | 0 | 0 | 0 | 0 | 0 | 0 | 0 | 0 | 0 | 0 | 1575  | 0 | 0 | 0 |
| 63 | 0 | 0 | 0 | 0 | 0 | 0 | 0 | 0 | 0 | 0 | 0 | 0 | 0 | 1252  | 0 | 0 | 0 |
| 64 | 0 | 0 | 0 | 0 | 0 | 0 | 0 | 0 | 0 | 0 | 0 | 0 | 0 | 994   | 0 | 0 | 0 |
| 65 | 0 | 0 | 0 | 0 | 0 | 0 | 0 | 0 | 0 | 0 | 0 | 0 | 0 | 789   | 0 | 0 | 0 |
| 66 | 0 | 0 | 0 | 0 | 0 | 0 | 0 | 0 | 0 | 0 | 0 | 0 | 0 | 627   | 0 | 0 | 0 |
| 67 | 0 | 0 | 0 | 0 | 0 | 0 | 0 | 0 | 0 | 0 | 0 | 0 | 0 | 498   | 0 | 0 | 0 |
| 68 | 0 | 0 | 0 | 0 | 0 | 0 | 0 | 0 | 0 | 0 | 0 | 0 | 0 | 396   | 0 | 0 | 0 |
| 69 | 0 | 0 | 0 | 0 | 0 | 0 | 0 | 0 | 0 | 0 | 0 | 0 | 0 | 315   | 0 | 0 | 0 |
| 70 | 0 | 0 | 0 | 0 | 0 | 0 | 0 | 0 | 0 | 0 | 0 | 0 | 0 | 249   | 0 | 0 | 0 |
| 71 | 0 | 0 | 0 | 0 | 0 | 0 | 0 | 0 | 0 | 0 | 0 | 0 | 0 | 199   | 0 | 0 | 0 |
| 72 | 0 | 0 | 0 | 0 | 0 | 0 | 0 | 0 | 0 | 0 | 0 | 0 | 0 | 157   | 0 | 0 | 0 |
| 73 | 0 | 0 | 0 | 0 | 0 | 0 | 0 | 0 | 0 | 0 | 0 | 0 | 0 | 125   | 0 | 0 | 0 |
| 74 | 0 | 0 | 0 | 0 | 0 | 0 | 0 | 0 | 0 | 0 | 0 | 0 | 0 | 100   | 0 | 0 | 0 |
| 75 | 0 | 0 | 0 | 0 | 0 | 0 | 0 | 0 | 0 | 0 | 0 | 0 | 0 | 79    | 0 | 0 | 0 |
| 76 | 0 | 0 | 0 | 0 | 0 | 0 | 0 | 0 | 0 | 0 | 0 | 0 | 0 | 62    | 0 | 0 | 0 |
| 77 | 0 | 0 | 0 | 0 | 0 | 0 | 0 | 0 | 0 | 0 | 0 | 0 | 0 | 50    | 0 | 0 | 0 |
| 78 | 0 | 0 | 0 | 0 | 0 | 0 | 0 | 0 | 0 | 0 | 0 | 0 | 0 | 40    | 0 | 0 | 0 |
| 79 | 0 | 0 | 0 | 0 | 0 | 0 | 0 | 0 | 0 | 0 | 0 | 0 | 0 | 31    | 0 | 0 | 0 |
| 80 | 0 | 0 | 0 | 0 | 0 | 0 | 0 | 0 | 0 | 0 | 0 | 0 | 0 | 25    | 0 | 0 | 0 |
| 81 | 0 | 0 | 0 | 0 | 0 | 0 | 0 | 0 | 0 | 0 | 0 | 0 | 0 | 20    | 0 | 0 | 0 |
| 82 | 0 | 0 | 0 | 0 | 0 | 0 | 0 | 0 | 0 | 0 | 0 | 0 | 0 | 16    | 0 | 0 | 0 |
| 83 | 0 | 0 | 0 | 0 | 0 | 0 | 0 | 0 | 0 | 0 | 0 | 0 | 0 | 12    | 0 | 0 | 0 |
| 84 | 0 | 0 | 0 | 0 | 0 | 0 | 0 | 0 | 0 | 0 | 0 | 0 | 0 | 10    | 0 | 0 | 0 |
| 85 | 0 | 0 | 0 | 0 | 0 | 0 | 0 | 0 | 0 | 0 | 0 | 0 | 0 | 8     | 0 | 0 | 0 |
| 86 | 0 | 0 | 0 | 0 | 0 | 0 | 0 | 0 | 0 | 0 | 0 | 0 | 0 | 6     | 0 | 0 | 0 |
| 87 | 0 | 0 | 0 | 0 | 0 | 0 | 0 | 0 | 0 | 0 | 0 | 0 | 0 | 5     | 0 | 0 | 0 |
| 88 | 0 | 0 | 0 | 0 | 0 | 0 | 0 | 0 | 0 | 0 | 0 | 0 | 0 | 4     | 0 | 0 | 0 |
| 89 | 0 | 0 | 0 | 0 | 0 | 0 | 0 | 0 | 0 | 0 | 0 | 0 | 0 | 3     | 0 | 0 | 0 |
| 90 | 0 | 0 | 0 | 0 | 0 | 0 | 0 | 0 | 0 | 0 | 0 | 0 | 0 | 3     | 0 | 0 | 0 |
| 91 | 0 | 0 | 0 | 0 | 0 | 0 | 0 | 0 | 0 | 0 | 0 | 0 | 0 | 2     | 0 | 0 | 0 |
| 92 | 0 | 0 | 0 | 0 | 0 | 0 | 0 | 0 | 0 | 0 | 0 | 0 | 0 | 1     | 0 | 0 | 0 |
| 93 | 0 | 0 | 0 | 0 | 0 | 0 | 0 | 0 | 0 | 0 | 0 | 0 | 0 | 2     | 0 | 0 | 0 |
| 94 | 0 | 0 | 0 | 0 | 0 | 0 | 0 | 0 | 0 | 0 | 0 | 0 | 0 | 0     | 0 | 0 | 0 |
| 95 | 0 | 0 | 0 | 0 | 0 | 0 | 0 | 0 | 0 | 0 | 0 | 0 | 0 | 1     | 0 | 0 | 0 |
| 96 | 0 | 0 | 0 | 0 | 0 | 0 | 0 | 0 | 0 | 0 | 0 | 0 | 0 | 1     | 0 | 0 | 0 |
| 97 | 0 | 0 | 0 | 0 | 0 | 0 | 0 | 0 | 0 | 0 | 0 | 0 | 0 | 0     | 0 | 0 | 0 |
| 98 | 0 | 0 | 0 | 0 | 0 | 0 | 0 | 0 | 0 | 0 | 0 | 0 | 0 | 0     | 0 | 0 | 0 |
| 99 | 0 | 0 | 0 | 0 | 0 | 0 | 0 | 0 | 0 | 0 | 0 | 0 | 0 | 1     | 0 | 0 | 0 |



**Supplementary Table 9:** Comparison of metrics for scoring *de novo* variants in autism spectrum disorder probands (ASD) and intellectual disability probands (ID). P-values of a Wilcoxon rank sum test (with continuity correction) are provided for testing different groups of ASD and unaffected siblings (sib) and/or ID probands (pb) and unrelated control children (ct). "Shift" is "+" if values in the first group tested are larger and "-" if values in the second group tested are higher. "Counts" specifies the number of sites considered in both categories tested and "%used" provides the total fraction of sites being used for the test. "Fully def." are the subset of sites for which a score is available for all metrics evaluated. Note that SIFT scores have a negative score orientation (i.e. more deleterious variants are assigned lower scores), while all other scores reported use a positive score orientation.

|           | Test              | Shift | p-values | Counts   | %used | p-value (fully def.) | Counts  | %used |
|-----------|-------------------|-------|----------|----------|-------|----------------------|---------|-------|
| C-score   | ASD: pb/sib       | +     | 0.01489  | 960/487  | 100%  | 0.10153              | 534/290 | 57%   |
| PolyPhen  | ASD: pb/sib       | +     | 0.00411  | 546/295  | 58%   | 0.00362              | 534/290 | 57%   |
| SIFT      | ASD: pb/sib       | -     | 0.19268  | 556/295  | 59%   | 0.20907              | 534/290 | 57%   |
| mamPhCons | ASD: pb/sib       | +     | 0.80681  | 960/487  | 100%  | 0.77847              | 534/290 | 57%   |
| GerpS     | ASD: pb/sib       | +     | 0.87469  | 960/487  | 100%  | 0.87809              | 534/290 | 57%   |
| mamPhyloP | ASD: pb/sib       | +     | 0.58223  | 960/487  | 100%  | 0.70802              | 534/290 | 57%   |
| C-score   | ID: pb/ct         | +     | 0.00099  | 170/27   | 100%  | 0.01053              | 100/16  | 59%   |
| PolyPhen  | ID: pb/ct         | +     | 0.02674  | 101/17   | 60%   | 0.02736              | 100/16  | 59%   |
| SIFT      | ID: pb/ct         | -     | 0.50675  | 102/16   | 60%   | 0.54218              | 100/16  | 59%   |
| mamPhCons | ID: pb/ct         | +     | 0.00130  | 170/27   | 100%  | 0.12428              | 100/16  | 59%   |
| GerpS     | ID: pb/ct         | +     | 0.02449  | 170/27   | 100%  | 0.11108              | 100/16  | 59%   |
| mamPhyloP | ID: pb/ct         | +     | 0.29869  | 170/27   | 100%  | 0.29795              | 100/16  | 59%   |
| C-score   | ASD/ID [pb]       | -     | 0.00005  | 960/170  | 100%  | 0.00284              | 534/100 | 56%   |
| PolyPhen  | ASD/ID [pb]       | -     | 0.24172  | 546/101  | 57%   | 0.17287              | 534/100 | 56%   |
| SIFT      | ASD/ID [pb]       | +     | 0.06570  | 556/102  | 58%   | 0.08879              | 534/100 | 56%   |
| mamPhCons | ASD/ID [pb]       | -     | 0.00195  | 960/170  | 100%  | 0.07311              | 534/100 | 56%   |
| GerpS     | ASD/ID [pb]       | -     | 0.00405  | 960/170  | 100%  | 0.16736              | 534/100 | 56%   |
| mamPhyloP | ASD/ID [pb]       | -     | 0.02104  | 960/170  | 100%  | 0.10849              | 534/100 | 56%   |
| C-score   | ASD/ID [sib/ct]   | +     | 0.22019  | 487/27   | 100%  | 0.32873              | 290/16  | 60%   |
| PolyPhen  | ASD/ID [sib/ct]   | +     | 0.31150  | 295/17   | 61%   | 0.32438              | 290/16  | 60%   |
| SIFT      | ASD/ID [sib/ct]   | +     | 0.55627  | 295/16   | 61%   | 0.56924              | 290/16  | 60%   |
| mamPhCons | ASD/ID [sib/ct]   | +     | 0.04790  | 487/27   | 100%  | 0.34326              | 290/16  | 60%   |
| GerpS     | ASD/ID [sib/ct]   | +     | 0.39202  | 487/27   | 100%  | 0.36979              | 290/16  | 60%   |
| mamPhyloP | ASD/ID [sib/ct]   | +     | 0.98088  | 487/27   | 100%  | 0.74842              | 290/16  | 60%   |
| C-score   | ASD+ID: pb/sib+ct | +     | 0.00020  | 1130/514 | 100%  | 0.00904              | 634/306 | 57%   |
| PolyPhen  | ASD+ID: pb/sib+ct | +     | 0.00043  | 647/312  | 58%   | 0.00032              | 634/306 | 57%   |
| SIFT      | ASD+ID: pb/sib+ct | -     | 0.08709  | 658/311  | 59%   | 0.10219              | 634/306 | 57%   |
| mamPhCons | ASD+ID: pb/sib+ct | +     | 0.16893  | 1130/514 | 100%  | 0.36864              | 634/306 | 57%   |
| GerpS     | ASD+ID: pb/sib+ct | +     | 0.29732  | 1130/514 | 100%  | 0.48381              | 634/306 | 57%   |
| mamPhyloP | ASD+ID: pb/sib+ct | +     | 0.25753  | 1130/514 | 100%  | 0.40024              | 634/306 | 57%   |

**Supplementary Table 10:** Number of SNVs observed in whole genome sequencing of eleven human individuals from diverse human populations<sup>7</sup>. Shown are the numbers of variants with scaled C-scores greater than or equal to the median of the indicated known disease-causal variants. The average scaled C-score for Miller syndrome<sup>a</sup> is 17, for Freeman-Sheldon syndrome<sup>b</sup> is 30, for Kabuki syndrome<sup>c</sup> is 39, and across all pathogenic ClinVar variants is 23. Putative disease causing alleles are highly ranked in each of the personal genomes. For example, after filtering genome-wide variation from 1000G at a >1% cutoff, on average only 1066 variants (0.07%) in each genome have a C-score equal or greater to the average C-score of pathogenic ClinVar variants. This can be exploited to efficiently prioritize causal variants in whole genome shotgun experiments.

| C-score cutoff       |           |         | ≥ 17  |       | ≥ 23  |       | ≥ 30  |       | ≥ 39  |       |
|----------------------|-----------|---------|-------|-------|-------|-------|-------|-------|-------|-------|
| Population           | ID        | SNVs    | All   | ≤0.01 | All   | ≤0.01 | All   | ≤0.01 | All   | ≤0.01 |
| Dinka                | DNK02     | 1626608 | 29625 | 5305  | 6319  | 1217  | 781   | 172   | 11    | 6     |
| Mbuti                | HGDP00456 | 1699490 | 31445 | 8597  | 6656  | 1896  | 857   | 279   | 14    | 10    |
| French               | HGDP00521 | 1360989 | 24871 | 2212  | 5372  | 563   | 656   | 82    | 8     | 5     |
| Papuan               | HGDP00542 | 1318651 | 24344 | 3309  | 5201  | 772   | 607   | 122   | 14    | 7     |
| Sardinian            | HGDP00665 | 1341735 | 24550 | 2113  | 5203  | 491   | 664   | 92    | 9     | 6     |
| Han                  | HGDP00778 | 1367095 | 25162 | 2374  | 5419  | 598   | 673   | 98    | 10    | 4     |
| Yoruba               | HGDP00927 | 1677165 | 30719 | 5663  | 6577  | 1322  | 839   | 190   | 11    | 9     |
| Karitiana            | HGDP00998 | 1250306 | 22770 | 1884  | 4856  | 468   | 583   | 64    | 10    | 2     |
| San                  | HGDP01029 | 1810672 | 33456 | 11123 | 7064  | 2463  | 917   | 349   | 22    | 15    |
| Mandenka             | HGDP01284 | 1619742 | 29939 | 5569  | 6280  | 1275  | 757   | 192   | 11    | 7     |
| Dai                  | HGDP01307 | 1372851 | 25067 | 2480  | 5474  | 656   | 681   | 100   | 12    | 4     |
| <b>Average</b>       |           | 1495028 | 27450 | 4603  | 5856  | 1066  | 729   | 158   | 12    | 7     |
| <b>% of variants</b> |           | 100%    | 1.84% | 0.31% | 0.39% | 0.07% | 0.05% | 0.01% | 0.00% | 0.00% |

<sup>a</sup> Single nucleotide pathogenic variants considered for Miller syndrome: 16:72048540 C>T, 16:72050942 G>A, 16:72055100 C>T, 16:72055110 G>C, 16:72057435 C>T

<sup>b</sup> Single nucleotide pathogenic variants considered for Freeman-Sheldon syndrome: 17:10544635 G>A, 17:10544634 C>T

<sup>c</sup> We used the subset of single nucleotide variants from the MLL2 and ClinVar data sets described in the Supplementary Methods.



**Supplementary Table 12:** Comparison of CADD scores between GWAS and matched control SNP sets.

| Modification                     | Assoc Group           | # Assoc | Assoc Mean | Ctl Group     | # Ctl | Ctl Mean | p-value   |
|----------------------------------|-----------------------|---------|------------|---------------|-------|----------|-----------|
| None                             | Matched*              | 51693   | 3.92       | All           | 51693 | 3.47     | 5.82E-117 |
| None                             | Lead Matched          | 5498    | 4.48       | All Lead      | 5498  | 3.93     | 1.27E-12  |
| None                             | Tag Matched           | 46195   | 3.85       | All Tag       | 46195 | 3.42     | 5.11E-107 |
| None                             | All                   | 64069   | 3.96       | All           | 51693 | 3.47     | 3.34E-146 |
| None                             | All Lead              | 7531    | 4.46       | All Lead      | 5498  | 3.93     | 5.13E-13  |
| None                             | All Tag               | 56538   | 3.89       | All Tag       | 46195 | 3.42     | 2.33E-133 |
| Match Dist < 10kb ("MD")**       | Lead Matched, MD      | 907     | 4.37       | All Lead, MD  | 907   | 3.63     | 2.61E-05  |
| Match Allele Freq +/- 0.01("AF") | Lead Matched, AF      | 1715    | 4.56       | All, AF       | 9632  | 3.89     | 5.91E-06  |
| AF + MD                          | Lead Matched, AF + MD | 370     | 4.68       | Lead, AF + MD | 370   | 3.57     | 4.21E-04  |
| Match GERP +/- 0.1 ("MG")        | Lead Matched, MG      | 5159    | 4.29       | Lead, MG      | 5159  | 4.00     | 4.71E-05  |
| Remove Missense ("RM")           | Lead Matched, RM      | 5366    | 4.30       | Lead, RM      | 5433  | 3.86     | 1.36E-10  |
| RM                               | Lead Matched, RM      | 5366    | 4.30       | All Lead      | 5498  | 3.93     | 5.61E-09  |
| MG+RM                            | Lead Matched, MG + RM | 5052    | 4.14       | Lead, MG + RM | 5096  | 3.93     | 3.15E-04  |
| MG+RM                            | Lead Matched, MG + RM | 5052    | 4.14       | Lead, MG      | 5159  | 4.00     | 2.42E-03  |
| Remove TSS < 1kb ("RT")          | Lead Matched, RT      | 4951    | 4.38       | Lead, RT      | 5034  | 3.81     | 1.95E-12  |
| RT                               | Lead Matched, RT      | 4951    | 4.38       | Lead          | 5498  | 3.93     | 3.84E-09  |
| Match Conseq ("MC")              | Lead Matched, MC      | 5327    | 4.40       | Lead, MC      | 5327  | 3.94     | 1.30E-09  |
| MC + MG                          | Lead Matched, MC + MG | 4850    | 4.20       | Lead, MC + MG | 4850  | 3.98     | 1.05E-03  |
| RT+MC                            | Lead Matched, RT + MC | 4827    | 4.32       | Lead, RT + MC | 4864  | 3.82     | 4.61E-10  |
| RT+MC                            | Lead Matched, RT + MC | 4827    | 4.32       | Lead, MC      | 5327  | 3.94     | 3.84E-07  |

\*"Matched" refers to the subset of associated SNPs (leads, tags, or both; as indicated) for which an appropriate matched control SNP could be identified, in contrast with "All" which would include all associated (lead, tag, or both) SNPs including those for which a control could not be identified.

\*\*Abbreviation explanations: "MD" refers to the subset of associated-control SNP pairs within 10kb; "AF" refers to the subset of associated-control SNP pairs with a 1000 Genomes alternative allele frequency within 1%; "MG" refers to the subset of associated-control SNP pairs selected so that the distribution of conservation scores (as measured by GERP) are statistically indistinguishable; "RM" refers to the subset of SNPs (associated, control, or both) that are not missense (note that in one test associated RM SNPs are contrasted with all controls); "RT" refers to the subset of SNPs (associated, control, or both) that are at least 1kb from the nearest TSS (note that in one test associated RT SNPs are contrasted with all controls); "MC" refers to the subset of associated-control SNP pairs selected so that they have identical distributions of gene body overlaps/consequences (e.g., "stop\_gained", "intronic", "intergenic", etc.).

## **SUPPLEMENTARY NOTE**

### **1 – Simulated and observed variants**

The basis of the CADD framework is to capture correlates of selective constraint as manifested in differences between two datasets: (1) simulated events generated using parameters estimated from whole genome species alignments, which contain some proportion of deleterious alleles, and (2) species differences that underwent many generations of mostly purifying / negative selection and are depleted for deleterious alleles.

#### **Simulated variants**

We developed a genome-wide simulator of *de novo* germline variation. Our simulator was motivated by the parameters of the General Time Reversible (GTR) model<sup>8</sup>, but because the standard GTR does not naturally accommodate asymmetric CpG-specific mutation rates, we use a fully empirical model of sequence evolution with a separate rate for CpG dinucleotides and local adjustment of mutation rates. Simulation parameters were obtained from Ensembl Enredo-Pecan-Ortheus (EPO)<sup>9,10</sup> whole genome alignments of six primate species (Ensembl Compara release 66). Using a custom script to compare the inferred human-chimpanzee ancestor with its aligned human sequence, we obtained a genome-wide substitution rate matrix, local mutation rate estimates in blocks of 100 kb, as well as the frequency and length distribution of insertion and deletion events. The code and associated rate matrices underlying the genome-wide simulator are available for download on our website: <http://cadd.gs.washington.edu/simulator>

We applied these parameters to simulate single nucleotide (SNV) and insertion/deletion (indel) variants based on the human reference sequence (GRCh37). Variants were simulated by iterating through all bases of the human reference autosomes and the X chromosome and picking sites for mutation with probabilities corresponding to the genome-wide substitution rate matrix. We did not include the Y chromosome and additional contigs to exclude effects due to variation in sequence quality. The implementation of the simulator uses a predefined approximate number of mutations, including the relative rates of substitutions and indels based on the EPO alignments. Further, it locally adjusts the overall mutation rate based on the local mutation rate estimated by averaging over the five 100 kb blocks up- and downstream of the site as well as the block of the actual site (i.e. a 1.1 Mb sliding window). Using an approximate number of 40 million autosomal and 2 million X-chromosomal mutations, we simulated a total of 46,735,302 SNVs, 2,227,688 insertions (1 to 50 bp) and 3,291,250 deletions (1 to 50 bp). We limited the simulated variants to genomic regions for which an inferred human-chimpanzee ancestor sequence is available from the EPO alignments; this reduced the final numbers to 44,182,238 SNVs, 2,108,268 insertions and 3,116,551 deletions. These are referred to as "simulated variants".

#### **Observed variants**

We extracted sites where the human reference genome differs from the inferred human-chimp ancestral genome from the Ensembl EPO 6 primate alignments defined above, excluding variants in the most recent 1000 Genomes Project<sup>1</sup> data (1000G, variant release 3, 20101123) with a frequency of greater than 5%, and including variants where the human reference carries an ancestral allele (i.e. matching the inferred human-chimp ancestor sequence) but where the derived allele is observed with frequency above 95% in the 1000G data. Low frequency derived variants (DAF less than 95%) were excluded in order to guarantee that alleles were exposed to many generations of natural selection. We identified a total of 14,893,290 SNVs, and 627,071 insertions and 1,107,414 deletions (less than 50bp in length). We will refer to this set of variants as "HCdiff variants" or "observed variants". We note that even though we include high frequency derived alleles that are not fully fixed, they constitute

a small proportion of the observed variants; 99.37% of indels and 95.41% of SNVs in the set of observed variants are invariant in 1000G data.

## 2 – Variant annotation matrix

We used the Ensembl Variant Effect Predictor (VEP, Ensembl Gene annotation v68)<sup>6</sup> to obtain gene model annotation for single nucleotide and indel variants. For single nucleotide variants within coding sequence, we also obtained SIFT<sup>11</sup> and PolyPhen-2<sup>12</sup> scores from VEP. We combined output lines describing MotifFeatures with the other annotation lines, reformatted it to a pure tabular format and reduced the different Consequence output values to the following 17 levels: 3PRIME\_UTR, 5PRIME\_UTR, DOWNSTREAM, UPSTREAM, INTERGENIC, INTRONIC, NONCODING\_CHANGE, SYNONYMOUS, NON\_SYNONYMOUS, REGULATORY, CANONICAL\_SPLICE, SPLICE\_SITE, STOP\_GAINED, STOP\_LOST, INFRAME, FRAME\_SHIFT, and UNKNOWN. For training, if multiple VEP annotation lines were reported for the same variant (due to overlapping annotations), we picked the most deleterious based on the following ranking scheme: (1) VEP effect Sequence Ontology annotation containing substrings "coding", "missense", "synonymous", "stop", "mature", "splice", "initiator\_codon", "frame", or "terminal\_codon", (2) Sequence Ontology annotations containing "utr" or "regulatory", (3) Sequence Ontology annotations containing "intronic", "upstream", or "downstream", (4) everything else. We selected a random one if multiple lines with the same priority were observed.

To the 6 VEP input derived columns (chromosome, start, reference allele, alternative allele, variant type: SNV/INS/DEL, length) and 26 actual VEP output derived columns, we added 56 columns that contain the following annotation: the ancestral primate allele as obtained from the EPO six primate alignments; a Boolean column indicating whether the ancestral allele is different from the alternative allele; a Boolean column indicating whether the base substitution is a transition or transversion; the Duke University mapability score of 20bp and 35bp sequences as distributed by UCSC<sup>13</sup>; segmental duplication annotation as provided by UCSC<sup>14</sup>; PhastCons and phyloP conservation scores<sup>15</sup> for primate, mammalian and vertebrate multi-species alignments – all determined starting from UCSC whole genome alignments<sup>16</sup> but excluding the human reference sequence in score calculation<sup>a</sup>; GERP++<sup>17</sup> N/S and region scores/p-values; the background selection score (original coordinates transferred from NCBI36 to GRCh37)<sup>7,18</sup>; the maximum expression value, maximum H3K27 acetylation peak, maximum H3K4 methylation peak, maximum H3K4 trimethylation peak and maximum value in the nucleosome occupancy tracks provided for ENCODE cell lines in the UCSC super tracks<sup>13</sup>; maximum peaks and p-values from the Encode open chromatin UCSC track (includes Faire, Dnase, PolII, CTCF, Myc values as well as two summary scores)<sup>13</sup>; the genomic segment type assignment obtained from clustering of ENCODE features (Segway<sup>19</sup>); the total number of predicted transcription factor (TF) binding sites and the difference in base composition<sup>b</sup> from the reference allele to the alternative allele for TF binding motifs<sup>20</sup>; the number of different overlapping ENCODE transcription factors; the number and maximum peak of all overlapping ENCODE ChIP-seq transcription factor binding sites in different cell/tissue types<sup>20</sup> (UCSC EncodeAwgTfbsUniform tracks excluding transcriptions factors already used in open chromatin track); a Boolean column indicating whether this site is observed in the above described 1000 Genome variants or the Exome Sequencing Project (ESP) variants<sup>4</sup>; the average allele frequency in 1000 Genomes and the average allele frequency in 1000 Genomes limited to Asian populations, limited to South American population, limited to African populations, and limited to European populations; the average alternative allele frequency in ESP and the average alternative allele frequency in ESP for individuals of African ancestry and individuals of European ancestry; the distance to the closest transcribed sequence start (TSS) and transcribed sequence end (TSE) position in the Ensembl v68 transcript annotation; the distance to the next splice site if 20bp upstream or downstream, in which case it is also indicated

---

<sup>a</sup> modifications of PHAST code available on request

<sup>b</sup> E.g. for a motif represented by 80% A and 20%T, a Ref/Alt SNP of A/T yields a value of 0.6, while a SNP of T/A results in -0.6.

whether this site is approached from within an exon or intron and whether it is a splice acceptor or donor site; and finally the Grantham score<sup>21</sup> associated with a reported amino acid substitution. Supplementary Table 1 lists all columns of the obtained annotation matrix.

If position values (cDNApos, CDSpos, protPos) for indels were provided as value ranges by VEP, we picked the first value reported for the interval. For the additional annotations, we extracted the most extreme value across the positions impacted by an indel event (i.e. all deleted bases for deletions and the base before and after the event for insertions).

### 3 – Imputation

From the annotation described above, some columns are not useful for model training (Chrom, Pos, AnnoType, ConsScore, ConsDetail, motifEName, GeneID, FeatureID, CCDS, GeneName, Exon, Intron) or need to be excluded from training as they will differ between the simulated variants and the human-chimpanzee ancestor differences for technical reasons (Anc, isDerived, mapAbility20bp, mapAbility35bp, scoreSegDup, known variation status and ESP/1000G frequency information). Importantly, no allele frequency information was used in model training. In order to fit models, missing values in the remaining annotations must be imputed. We imputed missing values in genome-wide measures by the genome average obtained from the simulated data, or set missing values to 0 where appropriate (Supplementary Table 2). Further, we created an "undefined" category for the categorical annotations (Segway, oAA, nAA, PolyPhenCat, SIFTcat, Dst2SplType) in order to accommodate missing values. In order to deal with missing values in annotations that are not defined on a subset of variants (cDNApos, relcDNApos, CDSpos, relCDSpos, protPos, relProtPos, Grantham, PolyPhenVal, SIFTval, as well as Dst2Splice ACCEPTOR and DONOR), we set the missing values to zero and also created indicator variables that contain a 1 if the corresponding variant is undefined, and a 0 otherwise. Since insertions and deletions may produce arbitrary length Ref/Alt and nAA/oAA columns (and thus not a fixed number of categorical levels), these values were set to N for Ref/Alt and set to "undefined" for nAA/oAA.

When extracting differences between the human-chimp ancestor and present-day human alleles, a deletion from the ancestor is described as an insertion into the human reference; the same applies when describing mutations from the ancestor; they are thus oriented back in time. In contrast, the simulation contains forward mutations of the human reference. To correct this effect, Ref/Alt and nAA/oAA columns were interchanged for HCdiff. For the same reasons, INS/DEL levels in the Type column and STOP\_GAINED/STOP\_LOST levels in the Consequence column were interchanged for the HCdiff variants before training.

Sites from the simulation were labeled +1 and sites identified from HCdiff -1. Only insertions and deletions shorter than 50bp were considered for model training and the Length column was capped at 49 for the prediction of longer events. The ratio of indel events to SNV events observed for the simulation (1:8.46) was also set for HCdiff by sampling an equal number of variants for both data sets: 13,141,299 SNVs, 627,071 insertions and 926,968 deletions each.

### 4 – Exploratory analysis of annotations

#### Univariate analyses of SNVs, insertions, and deletions

The following analyses were performed separately on the SNVs, insertions, and deletions. We split the variants into equally-sized training and test sets. For each feature, we fit a univariate logistic regression model on the training set in order to predict whether a site is observed or simulated using just that feature. We evaluated test set performance using (1) area under the curve (AUC), which is equivalent to a Mann-Whitney U-statistic, and which quantifies the extent to which simulated sites are given higher predictions of deleteriousness than observed sites; and (2) depletion of observed sites

among the 0.1%, 1%, and 10% of sites predicted to be most deleterious. An AUC of 0.5 is expected by chance, and an AUC near 1 indicates a model that successfully assigns higher predictions of deleteriousness to simulated sites than to observed sites. Depletion is defined as (fraction of observed sites among the x% predicted to be most deleterious)/(fraction of observed sites in the full data set); a value of 1 is expected by chance, and a small value indicates that the sites predicted to be most deleterious are predominantly simulated. Results are given in Supplementary Tables 3-5.

### Correlations among quantitative features

Supplementary Fig. 1 displays the correlations among the quantitative features in the observed and simulated SNV variants. There are very high levels of correlation within ENCODE annotations, conservation metrics, or the annotations that quantify a variant's position in the cDNA, CDS, or protein.

### Interactions among features

We explored the possibility of improving predictions of whether a SNV is observed or simulated by including interactions in the model. For each pair of features  $x_1$  and  $x_2$ , we used linear regression to fit a main effects model of the form  $y \sim x_1 + x_2$ , as well as an interaction model of the form  $y \sim x_1 + x_2 + x_1 x_2$ . Here  $y$  is a vector that encodes whether each variant is observed or simulated. Supplementary Fig. 2 displays the ratio of AUC for the interaction models to the AUC for the main effects models. We see that few of the interactions yielded a substantial improvement to the AUC relative to the main effects models.

### Distance to splice sites

Logistic regression models were fit to predict whether a SNV is observed or simulated, using its distance from splice site (treated as a categorical variable) for sites in the exon donor, intron donor, intron acceptor, and exon acceptor regions. We included variants within 20bp of a splice site that were neither non-synonymous, stop-gain, nor stop-loss events. Supplementary Fig. 3 displays the probability that a variant is observed (as opposed to simulated) given its splice position. The results indicate that variants located in the intron near splice sites are more likely to be simulated rather than observed; this is consistent with the notion that mutations in this region tend to be deleterious. There is clear evidence for preserving the canonical splice sites (i.e. the two intronic basepairs of splice donor and acceptor); in addition we see that for example multiple additional sites at the intron donor site are highly constrained.

### Depletion of observed sites by Consequence

For each consequence bin, we computed the depletion of observed SNVs in that bin: namely, (fraction of sites in that bin that are observed)/(fraction of all sites that are observed). Results are shown in Supplementary Table 6. The "stop-gained" bin is extremely depleted for real sites, as is the "non-synonymous" bin. "Synonymous", "(canonical) splice site", "3'UTR", and "5'UTR" are also depleted. Only the "upstream", "downstream", and "intergenic" bins are enriched for observed variants.

### Interaction between Consequence and position of mutation in cDNA

In order to determine whether the deleteriousness of a given Consequence is associated with the SNV's position within the cDNA, we fit a logistic regression model to predict whether a SNV is observed or simulated on the basis of Consequence, relcDNApos, and an interaction between the two. Results are shown in Supplementary Table 7. Synonymous, 5'UTR, non-coding, and non-



synonymous SNVs are less likely to be deleterious when they occur later in the cDNA, whereas the opposite is true for 3'UTR mutations.

## 5 – Model training

We generated ten training data sets by sampling an equal number of 13,141,299 SNVs, 627,071 insertions and 926,968 deletions from both the simulated variant and observed variant datasets. In order to train each support vector machine (SVM) model, the processed data was converted to a sparse matrix representation after converting all n-level categorical values to n individual Boolean flags. 1% of sites (~132,000 SNVs, 6,000 insertions and 9,000 deletions each) were randomly selected and used as a test data set. All other sites were used to train linear SVMs using the LIBOCAS v0.96 library<sup>22</sup>.

The SVM model fits a hyperplane as defined below.  $X_1, \dots, X_n$  are the 63 annotations described above (which are expanded from 63 to 166 due to the treatment of categorical annotations),  $W_1, \dots, W_{11}$  are the Boolean features that indicate whether a given feature (out of cDNApos, relcDNApos, CDSpos, relCDSpos, protPos, relProtPos, Grantham, PolyPhenVal, SIFTval, as well as Dst2Splice ACCEPTOR and DONOR) is undefined,  $1_{\{A\}}$  is an indicator variable for whether the event A holds, and D is the set of bStatistic, cDNApos, CDSpos, Dst2Splice, GerpN, GerpS, mamPhCons, mamPhyloP, minDistTSE, minDistTSS, priPhCons, priPhyloP, protPos, relcDNApos, relCDSpos, relProtPos, verPhCons, and verPhyloP. Due to the coding of categorical values using Boolean variables, the total number of features for this model is 949.

$$\begin{aligned}
0 &= \beta_0 + \sum_{i=1}^{166} \beta_i X_i + \sum_{i=1}^5 \sum_{j=1}^5 \gamma_{ij} 1_{\{ \text{ith Ref category and } j\text{th Alt category} \}} \\
&+ \sum_{i=1}^{21} \sum_{j=1}^{21} \delta_{ij} 1_{\{ \text{ith oAA category and } j\text{th nAA category} \}} \\
&+ \sum_{i=1}^{11} \tau_i W_i + \sum_{i=1}^{17} \sum_{j \in D} \alpha_{ij} 1_{\{ \text{ith Consequence category} \}} X_j
\end{aligned}$$

SVM models were trained, using various values for the generalization parameter (C), which assigns the cost of misclassifications. Supplementary Fig. 4 shows the model training convergence in 2000 iterations (~70h) for different settings of C. These results indicate that model training only converges within a reasonable amount of time for C values around 0.0025 and below. We therefore trained models for all ten training data sets with C=0.0025 and then compared predicted values for 100,000 random single nucleotide variants from 1000 Genomes and chromosome 21. The predicted values are highly correlated (all pairwise Spearman rank correlations > 0.99; Supplementary Fig. 5). Hence, we determined the average of the model parameters and continued with the average model.

## 6 – Model testing and validation

We annotated all 8.6 billion possible substitutions in the human reference genome (GRCh37), and applied the model to score all possible substitutions. When scoring sites with multiple VEP annotation lines, we score all possible annotations first and then report the one with the highest deleteriousness after applying the four hierarchy levels. As the scale of the model-based combined scores ("C-scores") resulting from the SVM model is effectively arbitrary, we mapped the C-scores to a phred-like scale ("scaled C-scores") ranging from 1 to 99 based on their rank relative to all possible substitutions in the human reference genome, i.e.  $-10 \log_{10}(\text{rank}/\text{total number of substitutions})$ . For example, the 1%

( $10^{-2}$ ) of all possible substitutions with the lowest scores – that is, least likely to be observed human alleles under our model – were assigned values of 20 or greater (" $\geq C20$ "). We used several datasets extracted from the literature and public databases to look at the performance of the model scores.

#### C-scores in specific gene classes

Motivated by the analysis performed by Khurana et al.<sup>23</sup>, we obtained genes with at least 5 disease mutations ("DM"; missense, non-sense and indels) from HGMD<sup>24</sup>, the 120 human non-immune essential genes (with associated diseases) described by Liao et al.<sup>25</sup>, GWAS genes as available from the reported genes column of <http://www.genome.gov/Pages/About/OD/OPG/GWAS%20Catalog/GWASCatalog112608.xls>, LoF genes from supplementary material 1 of MacArthur et al.<sup>26</sup> (filtered column == 0, at least 2 observations) and olfactory genes by matching "olfactory receptor" in the description field of the Ensembl 68 gene build. We matched all obtained gene IDs to Ensembl 68 protein-coding gene identifiers and applied the following hierarchy for genes observed in multiple categories: essential, disease, GWAS, olfactory, LoF. We also picked 500 random non-overlapping protein-coding genes for the "other" category. Supplementary Fig. 6 shows the median SNV C-scores across these genes coding sequence (padded by 10bp around each exon), the median C-score for putative missense (non-synonymous) variants and the median C-score of putative non-sense (stop-gained) variants.

#### MLL2 variants

We obtained a total of 210 mutations in MLL2 associated with Kabuki syndrome from Makrythanasis et al. 2013<sup>27</sup>. From the variants in Supplementary Table 9 of that manuscript, we excluded variants marked as possibly non-pathogenic and variants annotated on NG\_027827.1, as these could not automatically be converted to genomic coordinates using VEP<sup>6</sup>. We complemented those with 679 putatively benign variants observed in the Exome Sequencing Project (ESP)<sup>4</sup>, 273 of which are non-synonymous. Results for this data set are presented in Supplementary Fig. 10. The Kabuki syndrome-associated MLL2 variants are 46% frameshift indels, 37% nonsense, 16% missense, 1% inframe indels and <1% splice site events, while the ESP-based MLL2 variants are 40% missense, 31% synonymous, 21% intronic, 3% splice site events, 2% inframe indels and 6% other.

#### HBB variants

We downloaded a total of 119 SNVs, 30 insertions and 63 deletions (all required to be at most 50nt) within or near HBB that give rise to thalassemia from HbVar<sup>28</sup>. Disease categories were used as defined by HbVar, except that all types that are not "beta0" or "beta+" were pooled into one category, "other". Results for this analysis are presented in Supplementary Fig. 11. These variants are 13% frameshift indels, 11% missense, 8% nonsense, 17% splice site events, 20% deletions of unknown effect, 25% upstream/regulatory, and 4% other.

#### ClinVar

We obtained the ClinVar<sup>3</sup> data set (release date June 16 2012, [ftp://ftp.ncbi.nih.gov/snp/organisms/human\\_9606/VCF/clinvar\\_00-latest.vcf.gz](ftp://ftp.ncbi.nih.gov/snp/organisms/human_9606/VCF/clinvar_00-latest.vcf.gz)) from the American National Center for Biotechnology Information (NCBI). We extracted variants that were marked "pathogenic" or "non-pathogenic (benign)". However, we noticed that the benign variation had a very different composition in terms of the Consequence annotation compared to the pathogenic variation. Due to the restriction of the most predictive publically available scores (i.e. PolyPhen, SIFT) to non-synonymous changes, those scores were underrepresented in the benign set. We therefore selected a set of apparently benign ( $\geq 5\%$  allele frequency) variants from ESP that were matched to the pathogenic ClinVar sites in terms of their Consequence annotations. In addition, we generated a data set where we matched ESP and ClinVar frequencies to three decimal precisions of the alternative allele frequency. Further, due to the overlap of ClinVar and ESP variants with the PolyPhen training data set, we trained a separate

classifier without the PolyPhen features and we also checked the performance on the subset of ClinVar and ESP variants not used for PolyPhen training. To compare the performance of CADD with other publically available missense annotations not used in model training, we downloaded scores from dbNSFP 2.0<sup>5</sup>. Finally, we analyzed ClinVar pathogenic variants in the context of the eleven men data (see below). Results for these analyses are presented in Fig. 3 as well as Supplementary Figs. 12-16. The ClinVar pathogenic variants used here are 76% missense, 18% nonsense, 3% splice site events, 1% frameshift indels and 2% other (and ESP benign variants were always matched to the same distribution of categorical consequences).

#### Autism and intellectual disability variants

All high confidence *de novo* mutations were combined from five family based autism exome sequencing studies<sup>29-33</sup>. Calls from individuals studied in multiple studies were merged for a total of 948 ASD probands and 590 unaffected siblings. These included all validated variants from studies<sup>29-32</sup> as well as all sites from lossifov *et al.*<sup>33</sup> that passed SNVFilter and IndelFilter. Only coding and canonical splice-site positions were considered. Coding sites were defined by RefSeq, CCDS, and UCSC genes. All indel start positions (noting the position prior to the change) and alleles were reformatted to match the current VCF convention. In the case of complex mutation events (i.e. multiple base changes in close proximity) where multiple nucleotide changes were predicted to alter the protein, we provided the complex mutation to VEP, treating it like an indel for the scoring process. For sites with a non-synonymous and synonymous change, only the non-synonymous was considered. For the special case of two missense events reported in 12624.p1 (separated by 1.9kb, involving a possible processed pseudogene), we only considered the 5'-most variant (12:58129165). Further, we obtained the coding variants as described above for two family-based intellectual disability (ID) studies<sup>34,35</sup>. These calls came from 151 ID and 20 unrelated control families. Results of this analysis are shown in Supplementary Table 9. The variants are 61%/63% missense, 6%/4% nonsense, 4%/2% splice site events, 20%/25% synonymous and 10%/6% other in probands and controls, respectively.

#### ALDOB, ECR11 enhancers and HBB promoter

We obtained the expression fold change for each base substitution in *ALDOB* and *ECR11* from the supplementary data (<http://www.nature.com/nbt/journal/v30/n3/extref/nbt.2136-S2.zip>) of Patwardhan *et al.* 2012<sup>36</sup>. This data set contains a total of 777 variants for *ALDOB* and 1860 variants for *ECR11*. Further, we obtained the HBB promoter data from the supplementary data (<http://www.nature.com/nbt/journal/v27/n12/extref/nbt.1589-S2.zip>) of Patwardhan *et al.* 2009<sup>37</sup>. The promoter data set contains a total of 210 variants associated with an expression fold change. Results for this analysis are presented in Supplementary Fig. 17.

#### IARC p53 variants

We obtained a list of 23,788 single nucleotide somatic cancer mutations in p53 which were reported to the International Agency for Research on Cancer (IARC, <http://p53.iarc.fr/TP53SomaticMutations.aspx>). These mutations correspond to 2,068 distinct variants; we recorded the number of times that each variant was reported. The Spearman rank correlation between the number of observations per variant and the C-score is 0.38,  $p = 5.8 \times 10^{-73}$ .

#### Eleven men

We obtained GATK VCF variant call files for all autosomes and the X chromosome from shotgun sequencing of eleven men originating from diverse human populations (<sup>7</sup>, <http://cdna.eva.mpg.de/denisova/VCF/human/>). We filtered variants as described by Meyer *et al.* 2012<sup>7</sup> using the annotation available in the obtained VCF files. We removed: (1) positions with

extremely high or low coverage (upper and lower 2.5% of the coverage distribution for each sample), (2) positions surrounding insertions/deletions ( $\pm 5$  bp of an insertion/deletion), (3) positions identified as prone to systematic error in Illumina sequencing, (4) positions marked by soft masking in the human reference sequence, (5) positions with a 20-mer mapability score  $< 1$ , (6) positions with genotype quality (GQ)  $< 40$ , as well as (7) positions with a non-empty GATK flag field. Results of this analysis are shown in Fig. 4 and Supplementary Table 10 & 11.

## 7 – Increased C-scores of GWAS lead SNPs

We downloaded the National Human Genome Research Institute (NHGRI) genome-wide association study (GWAS) catalog (<http://www.genome.gov/gwastudies/>) on December 18, 2012, including 9,977 distinct SNP-trait associations spanning 7,531 unique SNPs in the 1000 Genomes release (v3 20101123); these variants are hereafter referred to as "lead SNPs". We used the Genome Variation Server (GVS, <http://gvs.gs.washington.edu/GVS137/>) to find all SNPs within 100 kb of a lead SNP that have a pairwise correlation of  $R^2 \geq 0.8$  within Utah residents with ancestry from northern and western Europe (CEU); we note that not all GWAS studies in the catalog were conducted within populations of European ancestry, but CEU was chosen as the single most broadly applicable population. This resulted in an additional 56,538 unique SNPs, hereafter referred to as "tag SNPs". Lead and tag SNPs are referred to as "trait-associated" or simply "associated".

We also developed "control" SNP sets, selected to match trait-associated SNPs for a variety of features that may bias SNPs found by GWAS in the absence of any causal effects. Specifically, for each trait-associated SNP we chose the closest SNP that has the same reference and alternate alleles, has a 1000 Genomes average alternate allele frequency within 5%, and has a similar SNP array presence profile. For the last criterion, rather than attempt to match for all possible SNP array designs, we chose to match for presence/absence on four widely used genotyping arrays that were directly used in many GWASs and indirectly capture many of the general biases that affect SNP array design: Affymetrix 5.0, Affymetrix 6.0, Illumina HumanHap 550, and Illumina 1M. Each control SNP was required to match the exact same combination of array presence/absence; for example, if an associated SNP is present on both Affymetrix arrays but neither Illumina array, then its matched control must also be present on both Affymetrix arrays and neither Illumina array.

No control SNPs were selected more than 500 kbp away from an associated SNP, and each control SNP was assigned to one and only one associated SNP. In total, we matched 5,498 lead SNPs (~73%) and 46,195 tag SNPs (~82%). The median distance between associated SNPs and their matched controls is 32,601 bp, while the median alternate allele frequency difference between associated SNPs and matched controls is 2%.

We subsequently compared C-score distributions between the associated and control SNPs defined above. Details of all statistical tests, including SNP set descriptions, counts, and p-values, are supplied in Supplementary Table 11. We note that, while scaled CADD score means are presented in the figures and tables to ease interpretation, most p-values below are computed using a Wilcoxon one-sided test on unscaled C-scores (similarly significant p-values and trends emerge using scaled or unscaled C-scores and using parametric or non-parametric tests, not shown).

Lead SNP C-scores are significantly higher than lead-matched controls ( $p = 1.27 \times 10^{-12}$ ); the difference is less pronounced, in terms of absolute score difference, for tag SNPs but also highly significant ( $p = 5.11 \times 10^{-107}$ ). The drop in scores from lead (mean scaled C-score of 4.46) to tag SNPs (mean of 3.89) would be expected if causal variants are more highly enriched among lead SNPs relative to tag SNPs, as is likely given that lead SNPs for any given locus are selected on the basis of showing the strongest association signal within that locus ([www.genome.gov/gwastudies](http://www.genome.gov/gwastudies)). However, the differences between leads and tags also correlates with differences in allele

frequencies, as tag SNPs tend to have higher alternate allele frequencies (median of 35%) than lead SNPs (median of 32%) and would thus tend to exhibit lower CADD scores as a result (Figure 1).

We also find that C-scores correlate with the sample size of the study that identified the associated SNP (Fig. 5; Kendall's rank correlation tau = .020; one-sided test  $p = 2.38 \times 10^{-12}$ ; note that SNPs found by multiple studies were assigned the largest sample size of the relevant studies). Matched control C-scores also correlate significantly, but less strongly than associated SNPs, with sample size (tau = 0.012;  $p = 3.32 \times 10^{-5}$ ), suggesting that changes in array-biases over time, differential regional enrichment effects of large vs. small studies, the more frequent usage of imputation methods in more recent (often larger) studies, or other technical confounders may contribute to the sample-size dependency observed for associated SNPs. However, the sample-size effect is substantially more pronounced in associated relative to control SNPs (Fig. 5, also compare correlation coefficients and significance estimates), and the difference between associated and control SNP C-score distributions widens as sample size increases. For example, from studies with sample sizes above the median (4,234 samples), the mean lead SNP scaled C-score is 4.63 vs a lead-matched control mean of 3.89 (difference of 0.74); for studies with sample sizes at or below the median, the lead SNP scaled C-score mean is 4.34 relative to a lead-matched control of 3.96 (difference of 0.38). Very similar results are observed when comparing C-scores to the p-values of the individual associations (Supplementary Figure 16), as would be expected assuming that stronger associations are more heavily enriched for causal variants (we note that study sample size and association p-value are highly correlated to one another, as smaller p-values tend to derive from larger studies).

The above results were generated using only those associated SNPs for which a match could be obtained; associated SNPs for which no match could be identified (i.e., no SNP meeting all the matching criteria within 500 kbp) have similar C-scores as associated SNPs with a match and also correlate with sample size and association significance (not shown). Their inclusion therefore tends to result in similarly highly significant test results as those presented here.

We also find that neither physical distance nor allele frequency discrepancies can explain the effects we observe. For example, CADD scores are significantly higher for lead SNPs that are < 10 kb from their matched control, for those that have a similar (+/- 1%) 1000 Genomes alternate allele frequency as their matched control, and also for lead SNPs that meet both criteria (Supplementary Table 11).

Finally, we examined the role of individual annotation contributions to the C-score differences between associated and control SNPs. In particular, we evaluated the contributions of missense variation, distance to transcriptional start site (TSS), gene body overlap/consequence, and sequence conservation. Such annotations may have intrinsic biases with respect to GWAS signals but are also likely to correlate with variant functionality/causality. Indeed, these features are among the most widely used criteria to evaluate candidate variants in disease studies and among the largest individual contributors to C-scores (Supplementary Table 3).

We find that each annotation explains part of the C-score differences, but none are sufficient to fully explain them, even when conservatively controlled for alone or in combination. For example (all relevant p-values and other information can be found in Supplementary Table 11):

- Lead SNPs are enriched for missense effects relative to controls (2.5% vs 1.2%), but the C-score difference remains significant after excluding missense variants from both lead and lead-matched controls, and remains significant even if missense variants are purged from lead SNPs but allowed to remain in controls.
- If we match lead SNPs with controls such that they have identical distributions of gene body overlaps/consequences (e.g., "intronic", "5prime\_utr", "non\_synonymous", etc.) annotations, we find that CADD scores of associated SNPs are still significantly higher than controls.

- Lead SNPs occur at significantly more conserved genomic positions, as measured by GERP<sup>38</sup>, than lead-matched controls ( $p = 1.1 \times 10^{-4}$ ). However, if we match lead SNPs to controls on their GERP score ( $\pm 0.1$ ), essentially purging the excess of highly conserved lead SNPs such that lead SNPs are not significantly more conserved than controls ( $p = 0.39$ ), we find that the difference in C-scores remains significant.
- A variety of other individual functional annotations are mildly enriched among GWAS SNPs ( $p$ -values comparing CADD score distributions with and without exclusion of the many possible individual functional annotations are not provided), but none are particularly strongly predictive in either a discrete or quantitative sense. For example, from ENCODE cell line data, lead SNPs tend to more frequently overlap, relative to controls, more highly expressed genes (Wilcoxon one-sided  $p = 0.0087$ ), open chromatin marks (19% vs. 17%), transcription factor binding sites (20% vs 17%), and consensus binding motifs (11.3% vs 10.4%). None of these distinctions can individually explain, or are as statistically strong as, the full CADD score separation between associated and control SNPs.
- If we both eliminate missense SNPs and match for conservation simultaneously, there remains a significant difference in C-scores between lead SNPs and controls, even if missense SNPs are removed from associated SNPs but retained in controls.

All the same trends and significant differences described here for lead and lead-matched control SNPs (i.e., controlling for conservation, gene consequence, missense, or distance to TSS) also hold for tag and tag-matched SNPs, with smaller absolute differences in C-scores that are more highly significant owing to the substantially increased SNP counts (not shown).

Thus, while we can find clear single-annotation contributors to the GWAS SNP C-score increase, no individual annotation differences are as statistically strong as that seen for C-scores and none can fully explain our observations. These observations suggest that CADD is able to effectively exploit multiple information sources and prioritize causal variants across a diverse range of functional and evolutionary categories.

## 8 – Notes on using scaled and unscaled C-scores

We believe that CADD scores are useful in two distinct forms, namely "raw" and "scaled". "Raw" CADD scores come straight from the SVM, and are interpretable as the extent to which the annotation profile for a given variant suggests that that variant is likely to be "observed" (negative values) vs "simulated" (positive values). These values have no absolute unit of meaning and are incomparable across distinct annotation combinations, training sets, or SVM model parameters. However, raw values do have relative meaning, with higher values indicating that a variant is more likely to be simulated (or "not observed") and therefore more likely to have deleterious effects.

Since the raw scores do have relative meaning, one can take a specific group of variants, define the rank for each variant within that group, and then use that value as a "normalized" and now externally comparable unit of analysis. In our case, we scored and ranked all ~8.6 billion SNVs of the GRCh37/hg19 reference and then "PHRED-scaled" those values by expressing them as rounded, order of magnitude values (with precision increasing for low ranks). For example, reference genome single nucleotide variants at the top 10% of CADD scores are assigned to CADD-10, top 1% to CADD-20, top 0.1% to CADD-30, etc. The results of this transformation are the "scaled" CADD scores.

The advantages and disadvantages of the score sets are summarized as follows:

1. *Resolution*: Raw scores offer superior resolution across the entire spectrum, and preserve relative differences between scores that may otherwise be rounded away in the scaled scores. For example, the bottom 90% (~7.74 billion) of all GRCh37/hg19 reference SNVs (~8.6 billion) are compressed into scaled CADD units of 0 to 10, while the next 9% (top 10% to top 1%, spanning ~774 million SNVs) occupy CADD-10 to CADD-20, etc., with the scaled units only getting close to resolving individual SNVs from one another at the extreme top end. As a result, many variants that have substantive raw score differences between them are rounded to the same or very similar scaled value.
2. *Frame of reference*: Since there must always be a top-ranked variant, second-ranked variant, etc, scaled scores are easier to interpret at first glance and will be comparable across CADD versions as we, for example, update the SVM to include new annotations or use alternative model-building methods. A scaled score of 10, for example, refers to the top 10% of all reference genome SNVs, regardless of the details of the annotation set, model parameters, etc. Furthermore, with scaled values one can always infer, with just a simple glance, the probability of picking a variant(s) at that score or greater when selecting randomly from all possible reference SNVs.

We envision the "typical use" cases for CADD, and appropriate choice of score set, as follows:

1. *Discovering causal variants within an individual, or small groups, of exomes or genomes*. Scaled CADD scores are most useful in this context, as one will generally only be interested or capable of reviewing a small set of the "most interesting" variants. In this setting, the distinction between a variant at the 25th percentile and 75th percentile is effectively irrelevant (scaled scores of ~0 to 1), while the difference between a variant in the top 10% (scaled score of 10) vs 1% (scaled score of 20) may be quite meaningful. Further, the absolute frame of the reference is valuable here, allowing an analyst to quickly place a variant in context and facilitate easier translation of results across publications, studies, etc.
2. *Fine-mapping to discover causal variants within associated loci*. As above, scaled scores are likely to be more useful here by allowing focus on a small set of manually reviewable best candidates and providing the absolute frame of the reference genome.
3. *Comparing distributions of scores between groups of variants, e.g., cases vs controls*. In this case, raw scores should be used, as they preserve distinctions that may be relevant across the entire scoring spectrum. Scaled scores may obscure systematic and potentially highly significant distinctions between two groups of variants (e.g., the first and third quartiles of all hg19 SNV scores). Further, since such analyses are generally conducted computationally and without manual intervention, the absolute frame of reference advantage to scaled scores is not as valuable in this context.

In the analyses presented in this manuscript, we used both sets of scores. For many figures and tables (e.g. Figure 1), we use scaled values to ease interpretation and take advantage of the absolute frame of a reference genome provided by GRCh37/hg19. Importantly, one must remember when examining these display items that high scaled values capture a tiny amount of the total universe of human SNVs: for example, there are only ~86,000 (out of ~8.6 billion) possible SNVs that score at or above CADD-50 (the maximum used for several figures/tables), and only ~8.6 million above CADD-30. Since high-scoring variants tend to be deleterious, these thresholds capture even smaller subsets of actually observed variants. For all distributional analyses, such as contrasting CADD scores between disease and benign variant sets, case and control exomes, associated and non-associated SNPs, raw scores were used to take advantage of their higher resolution.

## References:

1. The 1000 Genomes Project Consortium et al. An integrated map of genetic variation from 1,092 human genomes. *Nature* **491**, 56-65 (2012).
2. Chambers, J.M., Cleveland, W.S., Kleiner, B. & Tukey, P.A. *Graphical Methods for Data Analysis*, (Wadsworth International Group, Belmont, CA, 1983).
3. Baker, M. One-stop shop for disease genes. *Nature* **491**, 171 (2012).
4. Tennessen, J.A. et al. Evolution and functional impact of rare coding variation from deep sequencing of human exomes. *Science* **337**, 64-9 (2012).
5. Liu, X., Jian, X. & Boerwinkle, E. dbNSFP: a lightweight database of human nonsynonymous SNPs and their functional predictions. *Hum Mutat* **32**, 894-9 (2011).
6. McLaren, W. et al. Deriving the consequences of genomic variants with the Ensembl API and SNP Effect Predictor. *Bioinformatics* **26**, 2069-70 (2010).
7. Meyer, M. et al. A high-coverage genome sequence from an archaic Denisovan individual. *Science* **338**, 222-6 (2012).
8. Tavaré, S. Some probabilistic and statistical problems in the analysis of DNA sequences. *Lect. Math. Life Sci* **17**, 57-86 (1986).
9. Paten, B., Herrero, J., Beal, K., Fitzgerald, S. & Birney, E. Enredo and Pecan: genome-wide mammalian consistency-based multiple alignment with paralogs. *Genome Res* **18**, 1814-28 (2008).
10. Paten, B. et al. Genome-wide nucleotide-level mammalian ancestor reconstruction. *Genome Res* **18**, 1829-43 (2008).
11. Ng, P.C. & Henikoff, S. SIFT: Predicting amino acid changes that affect protein function. *Nucleic Acids Res* **31**, 3812-4 (2003).
12. Adzhubei, I.A. et al. A method and server for predicting damaging missense mutations. *Nat Methods* **7**, 248-9 (2010).
13. Rosenbloom, K.R. et al. ENCODE whole-genome data in the UCSC Genome Browser: update 2012. *Nucleic Acids Res* **40**, D912-7 (2012).
14. Fujita, P.A. et al. The UCSC Genome Browser database: update 2011. *Nucleic Acids Res* **39**, D876-82 (2011).
15. Hubisz, M.J., Pollard, K.S. & Siepel, A. PFAST and RPHAST: phylogenetic analysis with space/time models. *Brief Bioinform* **12**, 41-51 (2011).
16. Siepel, A. et al. Evolutionarily conserved elements in vertebrate, insect, worm, and yeast genomes. *Genome Res* **15**, 1034-50 (2005).
17. Davydov, E.V. et al. Identifying a high fraction of the human genome to be under selective constraint using GERP++. *PLoS Comput Biol* **6**, e1001025 (2010).
18. McVicker, G., Gordon, D., Davis, C. & Green, P. Widespread genomic signatures of natural selection in hominid evolution. *PLoS Genet* **5**, e1000471 (2009).
19. Hoffman, M.M. et al. Unsupervised pattern discovery in human chromatin structure through genomic segmentation. *Nat Methods* **9**, 473-6 (2012).
20. ENCODE Project Consortium et al. An integrated encyclopedia of DNA elements in the human genome. *Nature* **489**, 57-74 (2012).
21. Grantham, R. Amino acid difference formula to help explain protein evolution. *Science* **185**, 862-4 (1974).
22. Franc, V. & Sonnenburg, S. Optimized cutting plane algorithm for large-scale risk minimization. *The Journal of Machine Learning Research* **10**, 2157-2192 (2009).
23. Khurana, E., Fu, Y., Chen, J. & Gerstein, M. Interpretation of genomic variants using a unified biological network approach. *PLoS Comput Biol* **9**, e1002886 (2013).
24. Stenson, P.D. et al. The Human Gene Mutation Database: 2008 update. *Genome Med* **1**, 13 (2009).
25. Liao, B.Y. & Zhang, J. Null mutations in human and mouse orthologs frequently result in different phenotypes. *Proc Natl Acad Sci U S A* **105**, 6987-92 (2008).



26. MacArthur, D.G. et al. A systematic survey of loss-of-function variants in human protein-coding genes. *Science* **335**, 823-8 (2012).
27. Makrythanasis, P. et al. MLL2 mutation detection in 86 patients with Kabuki syndrome: a genotype-phenotype study. *Clin Genet* (2013).
28. Giardine, B. et al. HbVar database of human hemoglobin variants and thalassemia mutations: 2007 update. *Hum Mutat* **28**, 206 (2007).
29. O'Roak, B.J. et al. Exome sequencing in sporadic autism spectrum disorders identifies severe de novo mutations. *Nature genetics* **43**, 585-9 (2011).
30. O'Roak, B.J. et al. Sporadic autism exomes reveal a highly interconnected protein network of de novo mutations. *Nature* **485**, 246-50 (2012).
31. Sanders, S.J. et al. De novo mutations revealed by whole-exome sequencing are strongly associated with autism. *Nature* **485**, 237-41 (2012).
32. Neale, B.M. et al. Patterns and rates of exonic de novo mutations in autism spectrum disorders. *Nature* **485**, 242-5 (2012).
33. Iossifov, I. et al. De novo gene disruptions in children on the autistic spectrum. *Neuron* **74**, 285-99 (2012).
34. Rauch, A. et al. Range of genetic mutations associated with severe non-syndromic sporadic intellectual disability: an exome sequencing study. *Lancet* (2012).
35. de Ligt, J. et al. Diagnostic Exome Sequencing in Persons with Severe Intellectual Disability. *The New England journal of medicine* (2012).
36. Patwardhan, R.P. et al. Massively parallel functional dissection of mammalian enhancers in vivo. *Nat Biotechnol* **30**, 265-70 (2012).
37. Patwardhan, R.P. et al. High-resolution analysis of DNA regulatory elements by synthetic saturation mutagenesis. *Nat Biotechnol* **27**, 1173-5 (2009).
38. Cooper, G.M. et al. Distribution and intensity of constraint in mammalian genomic sequence. *Genome Res* **15**, 901-13 (2005).
